# Supplementary material for: FTO-dependent m6A modification of Plpp3 in circSCMH1-regulated vascular repair and functional recovery following stroke
Source: PubMed Central journal article supplement (PMC9886939; doi:10.1038/s41467-023-36008-y), 2023-01-30
Supplement: 41467_2023_36008_MOESM1_ESM.pdf [file 41467_2023_36008_MOESM1_ESM.pdf]

# Supplementary Information

## FTO-Dependent M<sup>6</sup>A Modification of *Plpp3* in CircSCMH1-Regulated Vascular Repair and Functional Recovery Following Stroke

Bin Li<sup>1, #</sup>, Wen Xi<sup>1, #</sup>, Ying Bai<sup>1</sup>, Xue Liu<sup>1</sup>, Yuan Zhang<sup>1</sup>, Lu Li<sup>1</sup>, Liang Bian<sup>1</sup>, Chenchen Liu<sup>1</sup>, Ying Tang<sup>1</sup>, Ling Shen<sup>1</sup>, Li Yang<sup>1</sup>, Xiaochun Gu<sup>2</sup>, Jian Xie<sup>1</sup>, Zhongqiu Zhou<sup>1</sup>, Yu Wang<sup>1</sup>, Xiaoyu Yu<sup>1</sup>, Jianhong Wang<sup>3</sup>, Jie Chao<sup>4\*</sup>, Bing Han<sup>1\*</sup>, and Honghong Yao<sup>1,5,6\*</sup>

<sup>1</sup> Department of Pharmacology, Jiangsu Provincial Key Laboratory of Critical Care Medicine, School of Medicine, Southeast University, Nanjing, Jiangsu, China

<sup>2</sup> Jiangsu Key Laboratory of Molecular and Functional Imaging, Department of Radiology, Zhongda Hospital, Medical School of Southeast University, Nanjing, Jiangsu, China

<sup>3</sup> National Research Facility for Phenotypic and Genetic Analysis of Model Animals, Kunming Institute of Zoology, Chinese Academy of Sciences, Kunming, Yunnan, China

<sup>4</sup> Department of Physiology, Jiangsu Provincial Key Laboratory of Critical Care Medicine, School of Medicine, Southeast University, Nanjing, Jiangsu, China

<sup>5</sup> Co-innovation Center of Neuroregeneration, Nantong University, Nantong, Jiangsu, China

<sup>6</sup> Institute of Life Sciences, Key Laboratory of Developmental Genes and Human Disease, Southeast University, Nanjing, Jiangsu, China

# These authors contributed equally: Bin Li, Wen Xi.

Addresses for Correspondence:

Honghong Yao, Ph.D

Department of Pharmacology, Jiangsu Provincial Key Laboratory of Critical Care Medicine

Medical School of Southeast University

Nanjing, 210009, Jiangsu, China

Tel: +86 25 8327 2551

E-mail: yaohh@seu.edu.cn

Bing Han, Ph.D

Department of Pharmacology, Jiangsu Provincial Key Laboratory of Critical Care Medicine

Medical School of Southeast University

Nanjing, 210009, Jiangsu, China

Tel: +86 25 8327 2551

E-mail: hanb@seu.edu.cn

Jie Chao, Ph.D

Department of Physiology, Jiangsu Provincial Key Laboratory of Critical Care Medicine

Medical School of Southeast University

Nanjing, 210009, Jiangsu, China

Tel: +86 25 8327 2312

E-mail: chaojie@seu.edu.cn

42 **Supplementary Table 1. The information of postmortem brain samples**

|                             | <b>Control (n=6)</b>                                                        | <b>AIS (n=6)</b> | <b><i>P</i> value</b> |
|-----------------------------|-----------------------------------------------------------------------------|------------------|-----------------------|
| <b>Age (years)</b>          | 62.33±1.05                                                                  | 62.83±2.39       | 0.851                 |
| <b>Gender</b>               | 5 males/1 female                                                            | 5 males/1 female | NA                    |
| <b>PMI (h)</b>              | 10.8±1.02                                                                   | 9.05±0.30        | 0.133                 |
| <b>Brain weight (g)</b>     | 1300±61.99                                                                  | 1203±42.38       | 0.226                 |
| <b>Storage time (years)</b> | 1.65±0.40                                                                   | 2.125±0.17       | 0.304                 |
| <b>Clinical diagnoses</b>   | Toxemia (2)<br>Pneumonia (1)<br>Respiratory failure (1)<br>Hypertension (2) | AIS (6)          | NA                    |

43 Note: AIS, acute ischemic stroke; PMI, post-mortem interval; NA, not applicable; Data were presented  
 44 as the mean±SEM; the Student *t* test (two-sided).

45 **Supplementary Table 2. The sequences used for plasmid construction.**

| Name                                                    | Sequence                                                                                                                                                                                                                                                                                                                                                                                                                                                                                                                                                                                                                                                                                                                                                                                                |
|---------------------------------------------------------|---------------------------------------------------------------------------------------------------------------------------------------------------------------------------------------------------------------------------------------------------------------------------------------------------------------------------------------------------------------------------------------------------------------------------------------------------------------------------------------------------------------------------------------------------------------------------------------------------------------------------------------------------------------------------------------------------------------------------------------------------------------------------------------------------------|
| mmu_circ_0001<br>254<br>(circSCMH1)                     | TCCTACACACCTCCAAGTAATGAGTTCAAGATCAGCATGAAATTG<br>GAAGCACAGGATCCCAGGAACACCACATCCACCTGTATTGCCACG<br>GTCGTTGGATTGACAGGTGCCCGACTTCGTCTGCGCCTTGATGGC<br>AGTGACAACAAGAATGACTTCTGGAGACTGGTTGACTCCTCTGAA<br>ATCCAGCCAATTGGAACTGTGAGAAGAATGGCGGGATGCTGCAG<br>CCCCCTCTAGGATTTCCGCTGAATGCCTCCTCTTGGCCCATGTTCC<br>TTTTGAAGACACTAAATGGAGCAGAGATGGCTCCCATCAAGATTT<br>TCCATAAGGAGCCACCATCACCTTCCCACAACCTTCTTCAAATGG<br>GAATGAAGTTAGAAGCTGTAGACAGAAAGAACCCTCATTTCATTT<br>GCCCAGCCACTATTGGAGAAGTTCGAGGCGCAGAAGTGCTAGTCA<br>CCTTTGATGGGTGGCGAGGCGCATTGACTACTGGTGCCGCTTTG<br>ACTCCCGGACATCTTTCCTGTGGGCTGGTGTCTTTGACTGGAG<br>ATAACCTGCAGCCACCTGGCACCAAAG                                                                                                                                                                    |
| Rhesus monkey<br>1:44027532 440<br>47653<br>(circSCMH1) | TCCTACACACCTCCAAGCAACGAATTCAAGATCAGTATGAAATTG<br>GAAGCACAGGACCCCAGGAACACCACATCCACCTGTATTGCCACA<br>GTAGTTGGACTGACAGGAGCCCGCCTTCGCCTGCGCCTTGATGGG<br>AGTGACAACAAAATGACTTCTGGCGGCTGGTTGACTCAGCTGAA<br>ATTCAGCCTATTGGAACTGTGAAAAGAATGGGGGTATGCTACAG<br>CCACCTCTTGATTTCCGCTGAATGCATCTTCTTGGCCCATGTTCT<br>TTTGAAGACATTAATGGAGCAGAGATGGCTCCCATCAGGATTTTC<br>CACAAGGAGCCACCATCACCTTCCCACAACCTTCTTCAAATGGGA<br>ATGAAGCTAGAAGCTGTGGACAGGAAGAACCCTCATTTCATTTGC<br>CCAGCCACTATTGGGGAGGTTCCGGGCTCAGAGGTGCTTGTCAC<br>TTTGATGGGTGGCGAGGGGCCTTTGACTACTGGTGCCGCTTCGAC<br>TCCCGGACATCTTCCCTGTGGGCTGGTGTCTTCTTGACTGGAGAC<br>AACCTACAGCCTCCTGGCACCAAAG                                                                                                                                                                      |
| Fat mass and<br>obesity<br>associated<br>(FTO)          | ATGAAGCGCGTCCAGACCGCGGAGGAACGAGAGCGGGAAGCTAA<br>GAAACTGAGGCTCCTTGAGGAGCTTGAAGACACTTGGCTTCCTTA<br>CCTGACCCCCAAAGATGATGAGTTCTATCAGCAGTGGCAGCTGAA<br>ATACCCTAAACTGGTTTTCCGAGAGGCCGCGCAGCATAACCAGAGGA<br>GCTGCATAAGGAGGTCCCCGAGGCCTTTCTCACACTGCATAAGCA<br>TGGCTGCTTGTTCGGGACGTGGTGAGGATCCAAGGCAAAGATGT<br>GCTCACCCAGTGTCTCGCATCCTCATCGGGACCCAGGCTGCAC<br>CTACAAGTACTTGAACACCAGACTCTTACGGTGCCCTGGCCCCGT<br>GAAGGGCTGCACGGTCAAGTACACAGAGGCTGAGATCGCCGCTG<br>CATGTCAGACCTTCTAAAGCTCAATGACTACCTCCAGGTGGAGA<br>CCATCCAGGCCTTGGAAAGAACTGGCTGTCAGAGAGAAGGCCAAT<br>GAAGACGCTGTGCCACTGTGCATGGCAGAGTTCCCCAGGGCCGG<br>CGTGGGGCCGTCCTGCGATGATGAAGTGGACCTTAAGAGCAGAGC<br>AGCCTACAACGTGACTTTGCTAAACTTCATGGATCCTCAGAAGAT<br>GCCCTACTTGAAAGAGGAGCCCTATTTCCGGCATGGGGAAGATGGC<br>GGTGAGCTGGCATCACGATGAGAACCTGGTGGACAGGTCAGCCG |

TGGCAGTGTACAGCTATAGCTGCGAAGGCTCTGAGGATGAAAGTG  
 AGGACGAGTCCAGCTTCGAAGGCAGAGATCCTGATACTTGGCATG  
 TTGGTTTTAAGATCTCTTGGGACATCGAGACACCAGGATTAACAAT  
 CCCTCTTACCAGGGAGACTGCTATTTTCATGCTGGATGACCTCAAT  
 GCCACCCACCAGCACTGTGTTTTGGCTGGCTCACAGCCTCGGTTT  
 AGTTCCACTCACCGTGTGGCAGAGTGCTCAACAGGCACCTTGGAT  
 TATATCTTAGAACGCTGTCAGTTGGCGCTGCAGAATGTCTCAATG  
 ACTCAGACGATGGCGACGTCTCGTTGAAATCCTTTGATCCTGCAGT  
 TTTGAAACAAGGAGAGGAAATCCATAATGAGGTGGAGTTTGAGTG  
 GCTGAGGCAGTTCTGGTTTCAAGGCAATCGATACAACTTTGCAC  
 CGATTGGTGGTGTGAGCCCATGACTCACCTGGAGGGGCTGTGGAA  
 GAAGATGGAGAGCATGACAAATGCGGTGCTCCGTGAAGTTAAAA  
 GAGAGGGGCTCCCGGTGGAACAAAGGAGTGAGATTCTGTCTGCC  
 ATCCTGGTCCCGCTCACCGTGCGCCAGAACCTGAGGAAGGAGTG  
 GCATGCCAGGTGCCAGTCCCGAGTCGTCCGACTTTACCAGTACA  
 GCAGAAACCAGACTGCCGGCCATATTGGGAGAAGGATGACCCTTC  
 CATGCCTCTGCCCTTTGACCTCACAGACGTGGTTTCCGAGCTCAG  
 AGGCCAGCTGCTGGAAGCAAGATCCGGCAGCGGCGAGGGCAGAG  
 GAAGTCTTCTAACATGCGGTGACGTGGAGGAGAATCCCGGCCCT  
 ATGCAAAGCTACAAGTACGACAAGGCGATCGTCCCTGAGAGTAAG  
 AACGGCGGCAGCCCGGCGCTCAACAACAACCCGAGGAAGGGCG  
 GCAGCAAGCGGGTGTGCTCATCTGCCTGGACCTCTTCTGCCTCTT  
 CATGGCGGCTCTGCCCTTCCCTCATCATCGAGACAAGCACCATTAAG  
 CCTTACCGTCGAGGGTTTTACTGCAATGACGAGAGCATCAAGTATC  
 CCCTGAAAGTCAGTGAGACTATAAACGATGCTGTGCTCTGTGCGG  
 TGGGGATCGTCATCGCCATCCTGGCGATCATTACAGGGGAATTCTA  
 CCGGATCTATTACCTCAAGGAGAAGTCCCGCTCCACCACTCAGAA  
 CCCGTATGTGGCAGCTCTCTATAAGCAAGTGGGATGCTTCCTTTTC  
 GGCTGTGCCATTAGCCAGTCCTTACCGACATCGCCAAAGTGTC  
 ATCGGGCGCCTGAGGCCTCACTTCCCTGAGCGTCTGTGACCCTGAT  
 TTCAGTCAGATCAATTGCTCCGAGGGCTACATTCAGAACTACAGG  
 TGCAGAGGAGAAGACAGCAAAGTACAGGAGGCCAGGAAGTCCTT  
 CTTCTCGGGCCACGCCCTCTTCTCCATGTTCACTATGCTGTATCTGG  
 TGCTCTACCTTCAGGCCCGCTTACCTGGCGCGGGGCCCGACTGC  
 TCCGCCCCCTCCTGCAGTTCACTTTGCTCATGATGGCCTTCTACAC  
 GGGATTGTACGGGTATCTGACTACAAGCATCATCCTAGCGATGTC  
 CTGGCAGGATTTGCCAAGGAGCTCTGGTGGCCTGCTGCATAGTG  
 TTCTTCGTGTCCGACCTCTTCAAGACTAAGACGAGCCTCTCACTG  
 CCCGCCCTGCGATCAGGAGGGAGATCCTGTCTCCCGTGGACATC  
 ATCGACAGGAACAATCACCATAACATGGTGGGCAGCGGCGAGGG  
 CAGAGGAAGTCTTCTAACATGCGGTGACGTGGAGGAGAATCCCG  
 GCCCT

Lipid phosphate  
 phosphatase 3  
 (*Plpp3*)

Cyclization  
 recombination

ATGTCCAATTTACTGACCGTACACCAAATTTGCCTGCATTACCGG  
 TCGATGCAACGAGTGATGAGGTTTCGCAAGAACCTGATGGACATGT

---

(Cre) TCAGGGATCGCCAGGCGTTTTCTGAGCATACCTGGAAAATGCTTCT  
GTCCGTTTGCCGGTCGTGGGCGGCATGGTGCAAGTTGAATAACCG  
GAAATGGTTTCCCGCAGAACCTGAAGATGTTTCGCGATTATCTTCTA  
TATCTTCAGGCGCGGGTCTGGCAGTAAAACTATCCAGCAACATT  
TGGGCCAGCTAAACATGCTTCATCGTCGGTCCGGGCTGCCACGAC  
CAAGTGACAGCAATGCTGTTTCACTGGTTATGCGGCGGATCCGAA  
AAGAAAACGTTGATGCCGGTGAACGTGCAAAACAGGCTCTAGCG  
TTCGAACGCACTGATTCGACCAGGTTTCGTTCACTCATGGAAAATA  
GCGATCGCTGCCAGGATATACGTAATCTGGCATTCTGGGGATTGC  
TTATAACACCCTGTTACGTATAGCCGAAATTGCCAGGATCAGGGTT  
AAAGATATCTCACGTA CTGACGGTGGGAGAATGTTAATCCATATTG  
GCAGAACGAAAACGCTGGTTAGCACCGCAGGTGTAGAGAAGGCA  
CTTAGCCTGGGGGTA ACTAAACTGGTCGAGCGATGGATTTCCGTCT  
CTGGTGTAGCTGATGATCCGAATAACTACCTGTTTTGCCGGGTCAG  
AAAAAATGGTGTGCGCGCCATCTGCCACCAGCCAGCTATCAAC  
TCGCGCCCTGGAAGGGATTTTTGAAGCAACTCATCGATTGATTTAC  
GGCGCTAAGGATGACTCTGGTCAGAGATACCTGGCCTGGTCTGGA  
CACAGTGCCCGTGTCTGGAGCCGCGCGAGATATGGCCCGCGCTGGA  
GTTTCAATACCGGAGATCATGCAAGCTGGTGGCTGGACCAATGTA  
AATATTGTCATGAACTATATCCGTAACCTGGATAGTGAAACAGGGG  
CAATGGTGC GCCTGCTGGAAGATGGCGATGGCAGCGGCGAGGGC  
AGAGGAAGTCTTCTAACATGCGGTGACGTGGAGGAGAATCCCGG  
CCCT

---

47 **Supplementary Table 3. The sequences of oligomers**

| Name                 | Sequence                                                                          |
|----------------------|-----------------------------------------------------------------------------------|
| shFTO (mouse)        | Sense: 5'- GCAGCUGAAAUAACCCUAAATT -3'<br>Antisense: 5'- UUUAGGGUAAUUCAGCUGCTT -3' |
| shLPP3 (mouse)       | Sense: 5'- GCUGCAUAGUGUUCUUCGUTT -3'<br>Antisense: 5'- ACGAAGAACACUAUGCAGCTT -3'  |
| siUBC13 (mouse)      | Sense: 5'- CGCAGGAUCAUCAAGGAAATT -3'<br>Antisense: 5'- UUUCCUUGAUGAUCCUGCGTT -3'  |
| siYTHDF2 (mouse)     | Sense: 5'- GCCCUAUCUAACUUCUUAUTT -3'<br>Antisense: 5'- AUAAGAAGUUAGAUAGGGCTT -3'  |
| siYTHDF2 (human)     | Sense: 5'- CCGUCCAUAUAAGUAUAAUTT -3'<br>Antisense: 5'- AUUAUACUUAUGGAACGGTT -3'   |
| si-circSCMH1 (mouse) | Sense: 5'- ACCUGGCACCAAAGUCCUATT -3'<br>Antisense: 5'- UAGGACUUUGGUGCCAGGUTT -3'  |

48

49

50 **Supplementary Table 4. Significantly upregulated m<sup>6</sup>A modification peaks (PT+EV-Vector vs**  
 51 **Sham)**

| Gene_name      | fold_change    | P_value            | Peak_start       | Peak_end         | Trans_id                    | Peak_region |
|----------------|----------------|--------------------|------------------|------------------|-----------------------------|-------------|
| <i>Ppp3</i>    | <b>3.70635</b> | <b>1.14815E-07</b> | <b>105232584</b> | <b>105232764</b> | <b>ENSMUST00000064139.7</b> | <b>utr3</b> |
| <i>Hnrnp1</i>  | 3.31728        | 0.0123027          | 50386437         | 50386527         | ENSMUST00000069304.13       | utr3        |
| <i>Hnrnp1</i>  | 3.24901        | 0.0141254          | 50386437         | 50386528         | ENSMUST00000109142.7        | utr3        |
| <i>Hnrnp1</i>  | 3.24901        | 0.0141254          | 50386437         | 50386528         | ENSMUST00000077817.7        | utr3        |
| <i>Plxnb2</i>  | 2.92817        | 0.00549541         | 89155578         | 89155728         | ENSMUST00000060808.9        | utr3        |
| <i>Plxnb2</i>  | 2.88786        | 0.0060256          | 89155578         | 89155729         | ENSMUST00000109331.7        | utr3        |
| <i>Akap17b</i> | 2.49666        | 0.030903           | 36611777         | 36611987         | ENSMUST00000051906.12       | cds         |
| <i>Isca2</i>   | 2.34567        | 0.0218776          | 84774996         | 84775085         | ENSMUST00000021667.6        | utr3        |
| <i>Grin2b</i>  | 2.28153        | 0.0186209          | 135731082        | 135731263        | ENSMUST00000111905.7        | utr3        |
| <i>Acs13</i>   | 2.23457        | 0.0131826          | 78706874         | 78706995         | ENSMUST00000035779.14       | utr3        |
| <i>Grin2b</i>  | 2.21914        | 0.0239883          | 135731081        | 135731262        | ENSMUST00000053880.12       | utr3        |
| <i>Zef1</i>    | 2.18859        | 0.00707946         | 72926877         | 72927118         | ENSMUST00000207107.1        | utr3        |
| <i>Fam49a</i>  | 2.14355        | 0.00194984         | 12376268         | 12376389         | ENSMUST00000069066.13       | utr3        |
| <i>Zef1</i>    | 2.07053        | 0.00707946         | 72926849         | 72927120         | ENSMUST00000172220.7        | utr3        |
| <i>Zef1</i>    | 2.07053        | 0.00707946         | 72926849         | 72927120         | ENSMUST00000069395.6        | utr3        |
| <i>Gpm6b</i>   | 2.05623        | 2.29087E-07        | 166388898        | 166388988        | ENSMUST00000060210.13       | utr3        |
| <i>Gpm6b</i>   | 2.05623        | 2.29087E-07        | 166388898        | 166388988        | ENSMUST00000112233.7        | utr3        |
| <i>Mgat5</i>   | 2.05623        | 0.0346737          | 127487856        | 127488037        | ENSMUST00000038361.10       | utr3        |
| <i>Tmem35a</i> | 2.04202        | 0.00562341         | 134304890        | 134305070        | ENSMUST00000037687.7        | utr3        |
| <i>Gpm6b</i>   | 2.02792        | 3.46737E-07        | 166388897        | 166388988        | ENSMUST00000112229.8        | utr3        |
| <i>Gpm6b</i>   | 2.02792        | 3.46737E-07        | 166388897        | 166388988        | ENSMUST00000112227.8        | utr3        |
| <i>Gpm6b</i>   | 2.02792        | 3.46737E-07        | 166388897        | 166388988        | ENSMUST00000112226.2        | utr3        |
| <i>Gpm6b</i>   | 2.02792        | 3.46737E-07        | 166388897        | 166388988        | ENSMUST00000112223.7        | utr3        |
| <i>Gpm6b</i>   | 2.02792        | 3.46737E-07        | 166388897        | 166388988        | ENSMUST00000112228.7        | utr3        |
| <i>Gpm6b</i>   | 2.02792        | 3.46737E-07        | 166388897        | 166388988        | ENSMUST00000112224.7        | utr3        |
| <i>Gpm6b</i>   | 2.02792        | 3.46737E-07        | 166388897        | 166388988        | ENSMUST00000112235.7        | utr3        |
| <i>Epha5</i>   | 2              | 0.0263027          | 84416608         | 84416819         | ENSMUST00000113401.3        | utr5        |

|                 |         |             |           |           |                       |           |
|-----------------|---------|-------------|-----------|-----------|-----------------------|-----------|
| <i>H13</i>      | 2       | 0.00144544  | 152704782 | 152705082 | ENSMUST00000125366.7  | utr3      |
| <i>Luzp2</i>    | 1.99861 | 0.0128825   | 55268167  | 55268258  | ENSMUST00000082373.7  | utr3      |
| <i>Arhgap21</i> | 1.94801 | 0.00812831  | 20847918  | 20848069  | ENSMUST00000154230.8  | utr3      |
| <i>Arhgap21</i> | 1.94801 | 0.00812831  | 20847918  | 20848068  | ENSMUST00000114594.7  | utr3      |
| <i>Mfsd2a</i>   | 1.93187 | 0.0489779   | 122946849 | 122947029 | ENSMUST00000030408.11 | utr3      |
| <i>Slc2a3</i>   | 1.90264 | 0.0301995   | 122727838 | 122727959 | ENSMUST00000032476.10 | utr3      |
| <i>Tdrkh</i>    | 1.9     | 0.0371535   | 94425947  | 94426158  | ENSMUST00000196386.4  | utr3      |
| <i>Epha5</i>    | 1.88557 | 0.0301995   | 84416591  | 84416831  | ENSMUST00000053733.14 | utr5      |
| <i>Brd9</i>     | 1.88296 | 0.0112202   | 73960773  | 73960894  | ENSMUST00000222399.1  | utr3      |
| <i>Tdrkh</i>    | 1.87125 | 0.040738    | 94425948  | 94426154  | ENSMUST00000200486.4  | cds, utr3 |
| <i>Brd9</i>     | 1.86607 | 0.0123027   | 73960775  | 73960895  | ENSMUST00000099384.3  | utr3      |
| <i>Ptges3</i>   | 1.84165 | 0.00512861  | 128077032 | 128077272 | ENSMUST00000052798.13 | utr3      |
| <i>Cyfp2</i>    | 1.8302  | 0.00316228  | 46193854  | 46193945  | ENSMUST00000093166.10 | utr3      |
| <i>Cyfp2</i>    | 1.81001 | 0.00281838  | 46193849  | 46193940  | ENSMUST00000165599.8  | utr3      |
| <i>Cyfp2</i>    | 1.81001 | 0.00281838  | 46193849  | 46193940  | ENSMUST00000093165.11 | utr3      |
| <i>Slc43a2</i>  | 1.80751 | 0.0323594   | 75577031  | 75577331  | ENSMUST00000169547.8  | utr3      |
| <i>Slc43a2</i>  | 1.80751 | 0.0323594   | 75577035  | 75577335  | ENSMUST00000042561.13 | utr3      |
| <i>Pafah1b1</i> | 1.80375 | 0.0114815   | 74674008  | 74674069  | ENSMUST00000021091.14 | utr3      |
| <i>Apc</i>      | 1.79502 | 0.0288403   | 34276566  | 34279278  | ENSMUST00000115781.9  | cds       |
| <i>Dnajc11</i>  | 1.78757 | 0.0251189   | 151981066 | 151981245 | ENSMUST00000062904.10 | utr3      |
| <i>Tpm3</i>     | 1.76418 | 0.0457088   | 90086496  | 90087485  | ENSMUST00000127955.1  | cds, utr5 |
| <i>Arl8b</i>    | 1.76296 | 0.000758578 | 108823578 | 108823787 | ENSMUST00000032196.8  | utr3      |
| <i>Nap114</i>   | 1.76174 | 0.0446684   | 143534366 | 143549104 | ENSMUST00000207948.1  | utr5      |
| <i>Lmbrd1</i>   | 1.7593  | 0.00812831  | 24762835  | 24763015  | ENSMUST00000095062.9  | utr3      |
| <i>Usp10</i>    | 1.74836 | 0.0371535   | 119957375 | 119957555 | ENSMUST00000144458.7  | utr3      |
| <i>Ntrk2</i>    | 1.72907 | 0.0114815   | 58932491  | 58932881  | ENSMUST00000224259.1  | utr3      |
| <i>H13</i>      | 1.7219  | 0.0112202   | 152704769 | 152705036 | ENSMUST00000089059.8  | utr3      |
| <i>Usp10</i>    | 1.7219  | 0.040738    | 119957380 | 119957560 | ENSMUST00000108988.8  | utr3      |
| <i>Scn2b</i>    | 1.70291 | 0.0229087   | 45127294  | 45127444  | ENSMUST00000170998.8  | utr3      |



|                |         |            |           |           |                       |           |
|----------------|---------|------------|-----------|-----------|-----------------------|-----------|
| <i>Txndc11</i> | 1.66324 | 0.0380189  | 11074910  | 11075179  | ENSMUST00000038424.13 | utr3, cds |
| <i>Dhx9</i>    | 1.66209 | 0.0229087  | 153455787 | 153455998 | ENSMUST00000042141.11 | utr3      |
| <i>Dhx9</i>    | 1.66209 | 0.0229087  | 153455787 | 153455996 | ENSMUST00000186380.6  | utr3      |
| <i>Prrc2c</i>  | 1.66094 | 0.00389045 | 162671934 | 162672234 | ENSMUST00000183223.7  | utr3      |
| <i>Slc38a1</i> | 1.65176 | 0.0316228  | 96571417  | 96571568  | ENSMUST00000100262.2  | utr3      |
| <i>Slc38a1</i> | 1.65176 | 0.0316228  | 96571417  | 96571568  | ENSMUST00000088454.11 | utr3      |
| <i>Slc38a1</i> | 1.65176 | 0.0316228  | 96571417  | 96571567  | ENSMUST00000088452.10 | utr3      |
| <i>Prrc2c</i>  | 1.64947 | 0.00398107 | 162671936 | 162672236 | ENSMUST00000182393.7  | utr3      |
| <i>Grin2b</i>  | 1.64832 | 0.00831764 | 135713232 | 135713383 | ENSMUST00000053880.12 | utr3      |
| <i>Ntrk2</i>   | 1.64832 | 0.0194984  | 58932483  | 58932872  | ENSMUST00000109838.9  | utr3      |
| <i>Araf</i>    | 1.64262 | 0.0060256  | 20852680  | 20852889  | ENSMUST00000120356.7  | utr3      |
| <i>Clqa</i>    | 1.64148 | 0.0199526  | 136895916 | 136896095 | ENSMUST00000046285.5  | utr3      |
| <i>Prrc2c</i>  | 1.63467 | 0.0047863  | 162671924 | 162672225 | ENSMUST00000182660.7  | utr3      |
| <i>Grin2a</i>  | 1.63241 | 0.0144544  | 9570746   | 9571017   | ENSMUST00000199708.4  | utr3      |
| <i>Lmbrd1</i>  | 1.63014 | 0.0141254  | 24762818  | 24763028  | ENSMUST00000191471.6  | utr3      |
| <i>Fgf13</i>   | 1.62789 | 0.0223872  | 59062621  | 59062920  | ENSMUST00000119833.7  | utr3      |
| <i>Fgf13</i>   | 1.62789 | 0.0229087  | 59062622  | 59062921  | ENSMUST00000119306.1  | utr3      |
| <i>Prrc2c</i>  | 1.62789 | 0.00512861 | 162671922 | 162672222 | ENSMUST00000182149.7  | utr3      |
| <i>Brd2</i>    | 1.62338 | 0.0398107  | 34112022  | 34112202  | ENSMUST00000114242.8  | utr3      |
| <i>Araf</i>    | 1.58777 | 0.00645654 | 20852665  | 20852904  | ENSMUST00000122312.7  | utr3      |
| <i>Dst</i>     | 1.58227 | 0.0489779  | 34174749  | 34177930  | ENSMUST00000183302.5  | cds       |
| <i>Brd2</i>    | 1.58118 | 0.0489779  | 34112022  | 34112203  | ENSMUST00000025193.12 | utr3      |
| <i>Numa1</i>   | 1.56917 | 0.0229087  | 101999271 | 101999689 | ENSMUST00000209639.1  | cds       |
| <i>Fgf13</i>   | 1.56808 | 0.0251189  | 59062620  | 59062948  | ENSMUST00000033473.11 | utr3      |
| <i>Kenip3</i>  | 1.56374 | 0.0323594  | 127457566 | 127457745 | ENSMUST00000103215.10 | utr3      |
| <i>Gpm6b</i>   | 1.54864 | 0.0186209  | 166386509 | 166386719 | ENSMUST00000112235.7  | utr3      |
| <i>Cops8</i>   | 1.53475 | 0.00676083 | 90612895  | 90613133  | ENSMUST00000036153.11 | utr3      |
| <i>Ubr4</i>    | 1.52944 | 0.0275423  | 139489377 | 139489558 | ENSMUST00000097822.9  | utr3      |
| <i>Mpp3</i>    | 1.52838 | 0.0245471  | 102000310 | 102000641 | ENSMUST00000062801.10 | utr3, cds |

---

|               |         |           |           |           |                       |           |
|---------------|---------|-----------|-----------|-----------|-----------------------|-----------|
| <i>Mpp3</i>   | 1.52838 | 0.0245471 | 102000310 | 102000641 | ENSMUST00000100400.8  | utr3, cds |
| <i>Ubr4</i>   | 1.52838 | 0.0346737 | 139489379 | 139489530 | ENSMUST00000165860.7  | utr3      |
| <i>Kpnb1</i>  | 1.52732 | 0.0446684 | 97159713  | 97159864  | ENSMUST00000001479.4  | utr3      |
| <i>Mpp3</i>   | 1.51992 | 0.0251189 | 102000305 | 102000633 | ENSMUST00000107168.7  | utr3, cds |
| <i>Frmd4a</i> | 1.51467 | 0.0436516 | 4611529   | 4612009   | ENSMUST00000075767.13 | utr3      |
| <i>Ppp3r1</i> | 1.5042  | 0.0158489 | 17200314  | 17200375  | ENSMUST00000102880.4  | utr3      |
| <i>Bnip3l</i> | 1.50108 | 0.0436516 | 66989415  | 66999534  | ENSMUST00000022634.8  | cds       |

---

52 Note: Rescaled hypergeometric test was used for data analysis.

53

54 **Supplementary Table 5. Significantly downregulated m<sup>6</sup>A modification peaks (PT+EV-**  
 55 **circSCMH1 vs PT+EV-Vector)**

| Gene_name       | fold_change     | P_value         | Peak_start       | Peak_end         | Trans_id                    | Peak_region |
|-----------------|-----------------|-----------------|------------------|------------------|-----------------------------|-------------|
| <i>Ppp3</i>     | <b>0.133046</b> | <b>2.51E-11</b> | <b>105232644</b> | <b>105232764</b> | <b>ENSMUST00000064139.7</b> | <b>utr3</b> |
| <i>Gpm6b</i>    | 0.279322        | 2.51E-19        | 166388898        | 166388988        | ENSMUST00000060210.13       | utr3        |
| <i>Gpm6b</i>    | 0.279322        | 2.51E-19        | 166388898        | 166388988        | ENSMUST00000112233.7        | utr3        |
| <i>Gpm6b</i>    | 0.283221        | 6.31E-19        | 166388897        | 166388988        | ENSMUST00000112235.7        | utr3        |
| <i>Gpm6b</i>    | 0.283221        | 6.31E-19        | 166388897        | 166388988        | ENSMUST00000112228.7        | utr3        |
| <i>Gpm6b</i>    | 0.283221        | 6.31E-19        | 166388897        | 166388988        | ENSMUST00000112229.8        | utr3        |
| <i>Gpm6b</i>    | 0.283221        | 6.31E-19        | 166388897        | 166388988        | ENSMUST00000112226.2        | utr3        |
| <i>Gpm6b</i>    | 0.283221        | 6.31E-19        | 166388897        | 166388988        | ENSMUST00000112223.7        | utr3        |
| <i>Gpm6b</i>    | 0.283221        | 6.31E-19        | 166388897        | 166388988        | ENSMUST00000112227.8        | utr3        |
| <i>Gpm6b</i>    | 0.283221        | 6.31E-19        | 166388897        | 166388988        | ENSMUST00000112224.7        | utr3        |
| <i>Acs13</i>    | 0.295248        | 0.002692        | 78706877         | 78706967         | ENSMUST00000142704.7        | utr3        |
| <i>Acs13</i>    | 0.29937         | 0.001318        | 78706874         | 78706965         | ENSMUST00000035779.14       | utr3        |
| <i>Hnrnp1</i>   | 0.301452        | 0.012303        | 50386437         | 50386527         | ENSMUST00000069304.13       | utr3        |
| <i>Hnrnp1</i>   | 0.307786        | 0.014125        | 50386437         | 50386528         | ENSMUST00000109142.7        | utr3        |
| <i>Hnrnp1</i>   | 0.307786        | 0.014125        | 50386437         | 50386528         | ENSMUST00000077817.7        | utr3        |
| <i>Akap17b</i>  | 0.353553        | 0.025119        | 36611777         | 36611957         | ENSMUST00000051906.12       | cds         |
| <i>Mfsd2a</i>   | 0.403321        | 0.006026        | 122946849        | 122946999        | ENSMUST00000030408.11       | utr3        |
| <i>Mgat5</i>    | 0.423373        | 0.020893        | 127487856        | 127488007        | ENSMUST00000038361.10       | utr3        |
| <i>Zef1</i>     | 0.429283        | 0.000363        | 72926817         | 72927118         | ENSMUST00000207107.1        | utr3        |
| <i>Zef1</i>     | 0.432269        | 0.000417        | 72926819         | 72927120         | ENSMUST00000069395.6        | utr3        |
| <i>Zef1</i>     | 0.432269        | 0.000417        | 72926819         | 72927120         | ENSMUST00000172220.7        | utr3        |
| <i>Clqa</i>     | 0.444421        | 1.26E-14        | 136895916        | 136896065        | ENSMUST00000046285.5        | utr3        |
| <i>Slc2a3</i>   | 0.444421        | 0.012883        | 122727838        | 122727929        | ENSMUST00000032476.10       | utr3        |
| <i>Tdrkh</i>    | 0.466516        | 0.044668        | 94425977         | 94426128         | ENSMUST00000196386.4        | utr3        |
| <i>Pafah1b1</i> | 0.486327        | 0.012589        | 74673978         | 74674039         | ENSMUST00000021091.14       | utr3        |
| <i>Tpm3</i>     | 0.493116        | 0.013804        | 90086496         | 90087485         | ENSMUST00000127955.1        | cds, utr5   |
| <i>Epha5</i>    | 0.496546        | 0.040738        | 84416626         | 84416806         | ENSMUST00000113399.5        | utr5        |

|                 |          |          |           |           |                       |           |
|-----------------|----------|----------|-----------|-----------|-----------------------|-----------|
| <i>Epha5</i>    | 0.496546 | 0.040738 | 84416626  | 84416806  | ENSMUST00000113406.7  | utr5      |
| <i>Pafah1b1</i> | 0.5      | 0.014791 | 74673979  | 74674040  | ENSMUST00000102520.8  | utr3      |
| <i>Tdrkh</i>    | 0.504526 | 0.039811 | 94425948  | 94426154  | ENSMUST00000200486.4  | cds, utr3 |
| <i>Epha5</i>    | 0.505226 | 0.038019 | 84416638  | 84416819  | ENSMUST00000113401.3  | utr5      |
| <i>Epha5</i>    | 0.506628 | 0.044668 | 84416625  | 84416806  | ENSMUST00000113403.7  | utr5      |
| <i>Epha5</i>    | 0.506628 | 0.044668 | 84416625  | 84416806  | ENSMUST00000113398.7  | utr5      |
| <i>Ubr4</i>     | 0.510152 | 0.000562 | 139489407 | 139489558 | ENSMUST00000097822.9  | utr3      |
| <i>Fgf13</i>    | 0.512989 | 0.026303 | 59062620  | 59062799  | ENSMUST00000033473.11 | utr3      |
| <i>Ubr4</i>     | 0.512989 | 0.00123  | 139489409 | 139489530 | ENSMUST00000165860.7  | utr3      |
| <i>Isca2</i>    | 0.514057 | 0.019953 | 84774966  | 84775085  | ENSMUST00000021667.6  | utr3      |
| <i>Epha5</i>    | 0.516199 | 0.030903 | 84416621  | 84416831  | ENSMUST00000053733.14 | utr5      |
| <i>Fgf13</i>    | 0.516915 | 0.026915 | 59062621  | 59062801  | ENSMUST00000119833.7  | utr3      |
| <i>Fgf13</i>    | 0.530344 | 0.033884 | 59062622  | 59062802  | ENSMUST00000119306.1  | utr3      |
| <i>Nap114</i>   | 0.534403 | 0.039811 | 143534366 | 143549104 | ENSMUST000000207948.1 | utr5      |
| <i>Luzp2</i>    | 0.53663  | 0.035481 | 55268167  | 55268258  | ENSMUST00000082373.7  | utr3      |
| <i>Slc43a2</i>  | 0.537002 | 0.015488 | 75577061  | 75577361  | ENSMUST00000169547.8  | utr3      |
| <i>Apc</i>      | 0.537747 | 0.044668 | 34276605  | 34279285  | ENSMUST00000066133.6  | cds       |
| <i>Grin2b</i>   | 0.540737 | 0.002291 | 135713232 | 135713383 | ENSMUST00000053880.12 | utr3      |
| <i>Apc</i>      | 0.541863 | 0.045709 | 34276596  | 34279278  | ENSMUST00000115781.9  | cds       |
| <i>Tmem35a</i>  | 0.549046 | 0.036308 | 134304860 | 134305011 | ENSMUST00000037687.7  | utr3      |
| <i>Slc43a2</i>  | 0.549427 | 0.018621 | 75577065  | 75577365  | ENSMUST00000042561.13 | utr3      |
| <i>Plxnb2</i>   | 0.550189 | 0.01122  | 89155548  | 89155788  | ENSMUST00000109331.7  | utr3      |
| <i>Plxnb2</i>   | 0.550189 | 0.01122  | 89155548  | 89155788  | ENSMUST00000060808.9  | utr3      |
| <i>Scn2b</i>    | 0.551717 | 0.035481 | 45127294  | 45127444  | ENSMUST00000170998.8  | utr3      |
| <i>Dhx9</i>     | 0.554785 | 0.003981 | 153455846 | 153456026 | ENSMUST00000186380.6  | utr3      |
| <i>H13</i>      | 0.554785 | 0.000708 | 152704752 | 152705112 | ENSMUST00000125366.7  | utr3      |
| <i>Bnip3l</i>   | 0.558644 | 0.017378 | 66989445  | 66993933  | ENSMUST00000022634.8  | cds       |
| <i>Araf</i>     | 0.559806 | 0.001479 | 20852680  | 20852859  | ENSMUST00000120356.7  | utr3      |
| <i>Dhx9</i>     | 0.560972 | 0.004571 | 153455847 | 153456028 | ENSMUST00000042141.11 | utr3      |

|                 |          |          |           |           |                       |           |
|-----------------|----------|----------|-----------|-----------|-----------------------|-----------|
| <i>Bnip3l</i>   | 0.56331  | 0.019953 | 66989426  | 66993913  | ENSMUST00000111115.7  | cds       |
| <i>Kcnp3</i>    | 0.566442 | 0.012589 | 127457566 | 127457715 | ENSMUST00000103215.10 | utr3      |
| <i>Kcnp3</i>    | 0.569197 | 0.012883 | 127457576 | 127457727 | ENSMUST00000028850.14 | utr3      |
| <i>Usp10</i>    | 0.577543 | 0.023442 | 119957380 | 119957560 | ENSMUST00000108988.8  | utr3      |
| <i>Lmbrd1</i>   | 0.581157 | 0.015849 | 24762835  | 24763015  | ENSMUST00000095062.9  | utr3      |
| <i>Arhgap21</i> | 0.582367 | 0.018197 | 20847918  | 20848069  | ENSMUST00000154230.8  | utr3      |
| <i>Arhgap21</i> | 0.582367 | 0.018197 | 20847918  | 20848068  | ENSMUST00000114594.7  | utr3      |
| <i>Brd9</i>     | 0.586011 | 0.007762 | 73960745  | 73960895  | ENSMUST00000099384.3  | utr3      |
| <i>Brd9</i>     | 0.586011 | 0.007762 | 73960743  | 73960894  | ENSMUST00000222399.1  | utr3      |
| <i>Usp10</i>    | 0.587231 | 0.027542 | 119957375 | 119957555 | ENSMUST00000144458.7  | utr3      |
| <i>Prrc2c</i>   | 0.587638 | 0.002344 | 162671934 | 162672234 | ENSMUST00000183223.7  | utr3      |
| <i>Arhgap21</i> | 0.592957 | 0.021878 | 20847939  | 20848090  | ENSMUST00000173194.7  | utr3      |
| <i>Prrc2c</i>   | 0.594604 | 0.002692 | 162671924 | 162672225 | ENSMUST00000182660.7  | utr3      |
| <i>Txndc11</i>  | 0.596668 | 0.014454 | 11074910  | 11075208  | ENSMUST00000038424.13 | utr3, cds |
| <i>Araf</i>     | 0.599155 | 0.002951 | 20852665  | 20852845  | ENSMUST00000122312.7  | utr3      |
| <i>Dst</i>      | 0.601235 | 0.019498 | 34308510  | 34308571  | ENSMUST00000097785.9  | utr3      |
| <i>Ntrk2</i>    | 0.601652 | 0.013804 | 58932462  | 58932881  | ENSMUST00000224259.1  | utr3      |
| <i>Dnajc11</i>  | 0.604159 | 0.0302   | 151981066 | 151981245 | ENSMUST00000062904.10 | utr3      |
| <i>Prrc2c</i>   | 0.604578 | 0.003548 | 162671922 | 162672222 | ENSMUST00000182149.7  | utr3      |
| <i>Fam49a</i>   | 0.605417 | 0.015136 | 12376238  | 12376389  | ENSMUST00000069066.13 | utr3      |
| <i>H13</i>      | 0.607518 | 0.00631  | 152704769 | 152705036 | ENSMUST00000089059.8  | utr3      |
| <i>Prrc2c</i>   | 0.60794  | 0.002455 | 162671907 | 162672236 | ENSMUST00000182393.7  | utr3      |
| <i>Numa1</i>    | 0.610473 | 0.012589 | 101999241 | 101999689 | ENSMUST00000209639.1  | cds       |
| <i>Brd2</i>     | 0.612593 | 0.022387 | 34112022  | 34112202  | ENSMUST00000114242.8  | utr3      |
| <i>Brd2</i>     | 0.612593 | 0.021878 | 34112022  | 34112203  | ENSMUST00000025193.12 | utr3      |
| <i>Ptges3</i>   | 0.616426 | 0.01122  | 128077032 | 128077272 | ENSMUST00000052798.13 | utr3      |
| <i>Ntrk2</i>    | 0.622437 | 0.017378 | 58932453  | 58932872  | ENSMUST00000109838.9  | utr3      |
| <i>Numa1</i>    | 0.624165 | 0.010233 | 101999248 | 101999758 | ENSMUST00000084852.12 | cds       |
| <i>Numa1</i>    | 0.624165 | 0.010471 | 101999258 | 101999769 | ENSMUST00000210475.1  | cds       |

---

|                |          |          |           |           |                       |           |
|----------------|----------|----------|-----------|-----------|-----------------------|-----------|
| <i>Frmd4a</i>  | 0.628942 | 0.019498 | 4611512   | 4612023   | ENSMUST00000091497.10 | utr3      |
| <i>Frmd4a</i>  | 0.629379 | 0.016982 | 4611509   | 4612047   | ENSMUST00000176828.7  | utr3      |
| <i>Lmbrd1</i>  | 0.631126 | 0.032359 | 24762818  | 24762998  | ENSMUST00000191471.6  | utr3      |
| <i>Frmd4a</i>  | 0.635516 | 0.02138  | 4611521   | 4612032   | ENSMUST00000177457.7  | utr3      |
| <i>Arl8b</i>   | 0.636397 | 0.008318 | 108823578 | 108823758 | ENSMUST00000032196.8  | utr3      |
| <i>Kpnb1</i>   | 0.64038  | 0.022909 | 97159713  | 97159864  | ENSMUST00000001479.4  | utr3      |
| <i>Frmd4a</i>  | 0.640824 | 0.020893 | 4611500   | 4612039   | ENSMUST00000075767.13 | utr3      |
| <i>Slc38a1</i> | 0.640824 | 0.045709 | 96571417  | 96571567  | ENSMUST00000088452.10 | utr3      |
| <i>Slc38a1</i> | 0.640824 | 0.045709 | 96571417  | 96571568  | ENSMUST00000088454.11 | utr3      |
| <i>Slc38a1</i> | 0.640824 | 0.045709 | 96571417  | 96571568  | ENSMUST00000100262.2  | utr3      |
| <i>Cops8</i>   | 0.644387 | 0.005129 | 90612895  | 90613133  | ENSMUST00000036153.11 | utr3      |
| <i>Mpp3</i>    | 0.644834 | 0.017783 | 102000280 | 102000581 | ENSMUST00000062801.10 | utr3, cds |
| <i>Mpp3</i>    | 0.644834 | 0.017783 | 102000280 | 102000581 | ENSMUST00000100400.8  | utr3, cds |
| <i>Mpp3</i>    | 0.648869 | 0.022909 | 102000305 | 102000574 | ENSMUST00000107168.7  | utr3, cds |
| <i>Cyfp2</i>   | 0.660211 | 0.003467 | 46196100  | 46196250  | ENSMUST00000142017.1  | utr3      |
| <i>Ppp3r1</i>  | 0.662963 | 0.012023 | 17200314  | 17200375  | ENSMUST00000102880.4  | utr3      |

---

56 Note: Rescaled hypergeometric test was used for data analysis.

57

58

59 **Supplementary Table 6. The primer sequences used for RT-PCR analysis**

| List of oligonucleotide sequences | 5'>3'                      |
|-----------------------------------|----------------------------|
| circSCMH1 (mouse)-F               | CTACTGGTGCCGCTTTGACT       |
| circSCMH1 (mouse)-R               | GGCACCTGTCAATCCAACGA       |
| circSCMH1 (human)-F               | CACTTTTGATGGGTGGCGAG       |
| circSCMH1 (human)-R               | TCGTTGCTTGGAGGTGTGTAG      |
| <i>Scmh1</i> (mouse)-F            | GTCAGAGGTCAGAGCAAGGT       |
| <i>Scmh1</i> (mouse)-R            | ATTCCAGTCACTAGGCTGCAT      |
| circHECW2 (mouse)-F               | AACAGGGACCTCGTGGGATT       |
| circHECW2 (mouse)-R               | GGCTGTCAATCCGTGCCTC        |
| <i>Gapdh</i> (mouse)-F            | AGGTCGGTGTGAACGGATTTG      |
| <i>Gapdh</i> (mouse)-R            | TGTAGACCATGTAGTTGAGGTCA    |
| <i>PLPP3</i> (human)-F            | CTGCGTCCTCACTTCTTGAGT      |
| <i>PLPP3</i> (human)-R            | ACACGAAGAAAACCTATGCAGC     |
| <i>Plpp3</i> (mouse)-F            | ATGCTGTATCTGGTGCTCTACC     |
| <i>Plpp3</i> (mouse)-R            | AGCTCCTTGGGCAAATCCTG       |
| <i>Plpp3</i> -peak (mouse)-F      | TGTCAGTATTTTTGTAAAGATTCCGT |
| <i>Plpp3</i> -peak (mouse)-R      | TGGTTAGTTGTGTTATGAGCTTTT   |
| <i>Hnrnph1</i> (mouse)-F          | AAATGGGGCTCAAGGTATTCCG     |
| <i>Hnrnph1</i> (mouse)-R          | GGACCAGTATGCTTCAACACC      |
| <i>Akap17b</i> (mouse)-F          | AAGAACAAGACCATGATAAGGGC    |
| <i>Akap17b</i> (mouse)-R          | GCAAACCACTTACAGGGCAAG      |
| <i>Mgat</i> (mouse)-F             | CTATGGATGGCTACCCCCACT      |
| <i>Mgat</i> (mouse)-R             | AAGGTAAACGAGGACACCAATTT    |
| <i>Zzef1</i> (mouse)-F            | GTCGCAACAGAAGTGGAAGA       |
| <i>Zzef1</i> (mouse)-R            | TCATGTCCGAGGTAAATCGGT      |
| <i>Acs13</i> (mouse)-F            | AACCACGTATCTTCAACACCATC    |
| <i>Acs13</i> (mouse)-R            | AGTCCGGTTTGGAAGTACAG       |
| <i>Epha5</i> (mouse)-F            | ATGGTACCTGCCAAGCTCCT       |

---

|                         |                           |
|-------------------------|---------------------------|
| <i>Epha5</i> (mouse)-R  | CCCTCGGCTGTAATACTGGTC     |
| <i>Gpm6b</i> (mouse)-F  | AACTTGTGCCACCGGCTATC      |
| <i>Gpm6b</i> (mouse)-R  | CAGCATTCTGAAGCAACCCAT     |
| <i>Ubc13</i> (mouse)-F  | GCTGGCAGAACCAGTTCCT       |
| <i>Ubc13</i> (mouse)-R  | TCCCTCAAAGGGGGAATCCTG     |
| <i>YTHDF2</i> (human)-F | AGCCCCACTTCCTACCAGATG     |
| <i>YTHDF2</i> (human)-R | TGAGAACTGTTATTTCCCCATGC   |
| <i>Ythdf2</i> (mouse)-F | GAGCAGAGACCAAAAAGGTCAAG   |
| <i>Ythdf2</i> (mouse)-R | CTGTGGGCTCAAGTAAGGTTC     |
| <i>ACTB</i> (human)-F   | GTTACAGGAAGTCCCTTGCCATC   |
| <i>ACTB</i> (human)-R   | TGTGGACTTGGGAGAGGACTG     |
| <i>Actb</i> (mouse)-F   | GGCTGTATTCCCCTCCATCG      |
| <i>Actb</i> (mouse)-R   | CCAGTTGGTAACAATGCCATGT    |
| <i>Fto</i> (mouse)-F    | CCTCTTACCAGGGAGACTG       |
| <i>Fto</i> (mouse)-R    | GCCACTCAAACCTCCACCTCAT    |
| 5'arms-F                | ATGCCACCAAAGTCATCAGTGTAG  |
| 5'arms-R                | AGGCGGGCCATTTACCGTAAGTTA  |
| 3'arms-F                | CCTCCTCTCCTGACTACTCCCAGTC |
| 3'arms-R                | TCACAGAAACCATATGGCGCTCC   |
| WT-F                    | AGTCTTCCCTTGCCTCTGCT      |
| WT-R                    | GGGTCTTCCACCTTTCTTCAG     |

---



61 **Supplementary Table 7. Details about antibodies**

| Antibody                                       | Vendor          | Catalog Number | Concentration                             |
|------------------------------------------------|-----------------|----------------|-------------------------------------------|
| APC anti-Mouse NCAM-1/CD56 Allophycocyanin MAb | R&D             | FAB7820A-100   | 1µl:2x10 <sup>5</sup> cells<br>(Flow Cyt) |
| Brilliant Violet 605™ anti-mouse CD31          | BioLegend       | 102427         | 1µl:2x10 <sup>5</sup> cells<br>(Flow Cyt) |
| FITC anti-mouse/human CD11b Antibody           | BioLegend       | 101205         | 1µl:1x10 <sup>6</sup> cells<br>(Flow Cyt) |
| PE anti-mouse ACSA-2                           | Miltenyi Biotec | 130-116-244    | 1µl:2x10 <sup>5</sup> cells<br>(Flow Cyt) |
| PerCp-Cy™5.5 anti-mouse CD45 Antibody          | BD Pharmingen   | 561869         | 1µl:1x10 <sup>6</sup> cells<br>(Flow Cyt) |
| CD31                                           | Abcam           | ab9498         | 1:50 (IF)                                 |
| CD31                                           | Invitrogen      | PA5-32321      | 1:100 (IF)                                |
| BrdU                                           | SantaCruz       | sc-51514       | 1:100 (IF)                                |
| Biotinylated-Isolectin B <sub>4</sub>          | SigmaAldrich    | L2140          | 1:200 (IF)                                |
| ZO-1                                           | Proteintech     | 21773-1-AP     | 1:1000 (WB)                               |
| Occludin                                       | Proteintech     | 13409-1-AP     | 1:1000 (WB)                               |
| Claudin-5                                      | Affinity        | AF5216         | 1:1000 (WB)                               |
| CD13                                           | R&D             | AF2335         | 1:400 (IF)                                |
| CD31                                           | Proteintech     | 28083-1-AP     | 1:2000 (WB)                               |
| FTO                                            | Proteintech     | 27226-1-AP     | 1:1000 (WB)                               |
| ALKBH5                                         | Proteintech     | 16837-1-AP     | 1:1000 (WB)                               |
| METTL3                                         | Proteintech     | 15073-1-AP     | 1:1000 (WB)                               |
| METTL14                                        | Proteintech     | 26158-1-AP     | 1:1000 (WB)                               |
| Synaptophysin                                  | Proteintech     | 17785-1-AP     | 1:2000 (WB)                               |
| WTAP                                           | Proteintech     | 10200-1-AP     | 1:1000 (WB)                               |
| UBC13                                          | Proteintech     | 10243-1-AP     | 1:1000 (WB)                               |
| Ub-K63                                         | Abways          | CY6579         | 1:2000 (WB)                               |
| LPP3/PPAP2B                                    | Invitrogen      | PA5-90665      | 1:1000 (WB)                               |

|                                                                       |             |            |              |
|-----------------------------------------------------------------------|-------------|------------|--------------|
| $\beta$ -actin                                                        | Proteintech | 66009-1-Ig | 1:3000 (WB)  |
| Histone-H3                                                            | Proteintech | 17168-1-AP | 1:3000 (WB)  |
| HRP-conjugated Affinipure goat anti-mouse IgG (H+L)                   | Proteintech | SA00001 -1 | 1:2,000 (WB) |
| HRP-conjugated Affinipure goat anti-rabbit IgG (H+L)                  | Proteintech | SA00001-2  | 1:2,000 (WB) |
| Alexa Flour <sup>TM</sup> 488 goat anti-mouse IgG secondary antibody  | Invitrogen  | A11001     | 1:300 (IF)   |
| Alexa Flour <sup>TM</sup> 594 goat anti-mouse IgG secondary antibody  | Invitrogen  | A11005     | 1:300 (IF)   |
| Alexa Flour <sup>TM</sup> 594 goat anti-rabbit IgG secondary antibody | Invitrogen  | A11012     | 1:300 (IF)   |
| Alexa Flour <sup>TM</sup> 488 goat anti-rabbit IgG secondary antibody | Invitrogen  | A11008     | 1:300 (IF)   |
| Streptavidin-FITC secondary antibody                                  | Invitrogen  | 434311     | 1:100 (IF)   |

62 Notes: Flow Cyt: flow cytometry; IF: Immunofluorescence; WB: Western Blot.

63

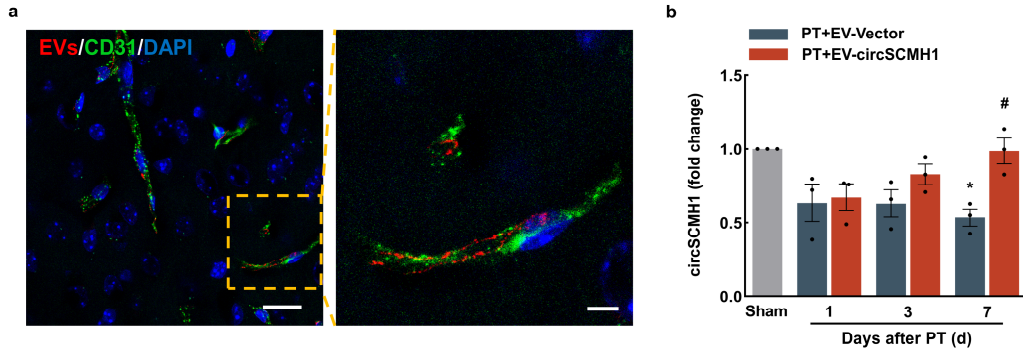

64

65 **Supplementary Fig. 1 Relative expression of circSCMH1 in the sorted endothelial cells from**  
 66 **PT model mice with EV-circSCMH1 treatment.**

67 **a**, The distribution of EVs in endothelial cells (CD31<sup>+</sup>) at 6 hours after intravenous injection. Scale  
 68 bars, 20 μm (overview), 5 μm (insets). Red dots, DiI<sup>+</sup> EVs. Data are representative of three  
 69 independent experiments. **b**, ECs were isolated from peri-infarct tissues of PT stroke mice with EV-  
 70 circSCMH1 treatment. Relative expression of circSCMH1 in the sorted ECs as determined by qPCR.  
 71 n=3 samples for each group. Each sample was pooled from 8 animals. \**P*=0.0308 versus sham,  
 72 #*P*=0.0372 versus PT+EV-Vector. The data in **b** were expressed as means±SEM; one-way ANOVA  
 73 followed by Holm-Sidak post hoc multiple comparison test. Source data are provided as a Source  
 74 Data file. CD31: platelet endothelial cell adhesion molecule-1; circSCMH1: circular RNA SCM1;  
 75 DAPI: 4',6-Diamidino-2-phenylindole; d: day; EV: extracellular vesicle; PT: photothrombotic.

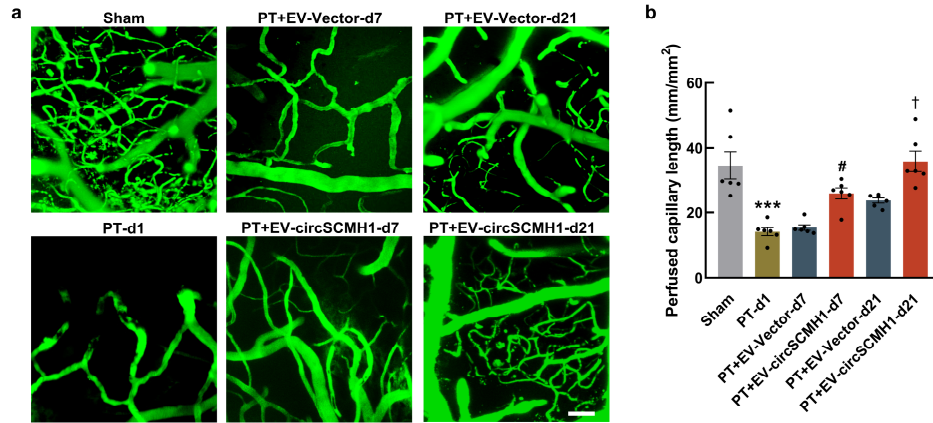

76

77

**Supplementary Fig. 2 *In-vivo* multiphoton microscopic images in cortical capillaries.**

78

**a**, Representative *in vivo* multiphoton microscopic images of cortical capillaries in real time in the

79

living mouse brain. For visualization of the brain vasculature, FITC-dextran (MW=2,000,000 Da)

80

was injected intravenously just before the imaging experiment. Scale bars, 50  $\mu$ m. **b**, Perfused

81

capillary length was analyzed by Angitool. n=6 mice/group. \*\*\* $P$ <0.0001 versus sham; # $P$ =0.0303

82

versus PT+EV-Vector-d7; † $P$ =0.0105 versus PT+EV-Vector-d21. The data in **b** were expressed as

83

means $\pm$ SEM; one-way ANOVA followed by Holm-Sidak post hoc multiple comparison test. Source

84

data are provided as a Source Data file. circSCMH1: circular RNA SCMH1; d: day; EV:

85

extracellular vesicle; PT: photothrombotic.

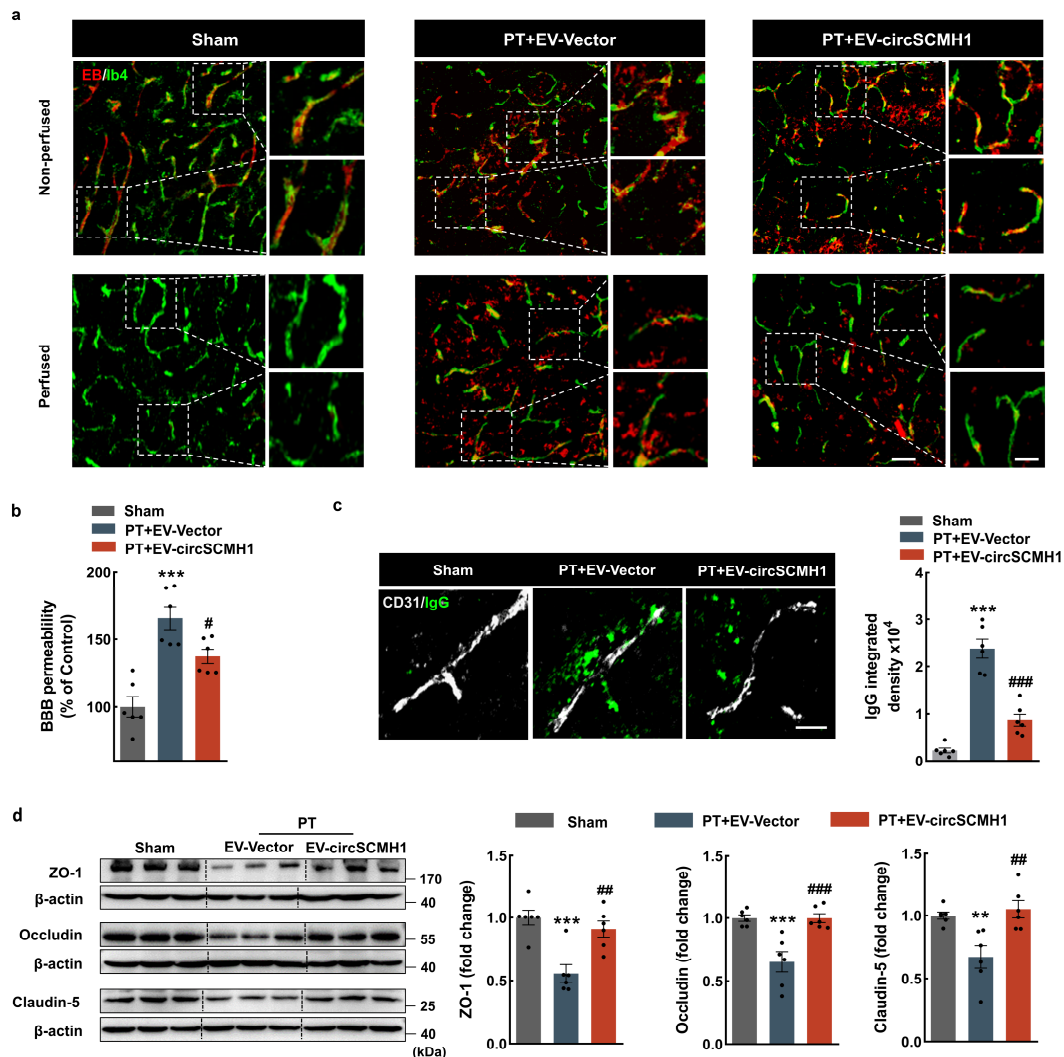

86

87 **Supplementary Fig. 3 EV-mediated circSCMH1 maintained the integrity of the blood-brain**  
 88 **barrier during stroke recovery.**

89 **a**, Representative images of Evans blue extravascular deposits in the peri-infarct cortex at day 21  
 90 after PT. Scale bars, 20  $\mu\text{m}$  (overview), 5  $\mu\text{m}$  (insets). **b**, Cerebrovascular permeability was  
 91 determined by measuring the concentrations of brain-extracted Evans blue using spectrophotometry  
 92 at 620 nm at day 21 after PT.  $n=6$  mice/group,  $***P<0.0001$  versus sham;  $\#P=0.0142$  versus PT+EV-  
 93 Vector. **c**, Representative images of IgG extravascular deposits in the peri-infarct cortex at day 21  
 94 after PT. Scale bars, 10  $\mu\text{m}$ . the IgG integrated density was measured by ImageJ.  $n=6$  mice/group,  
 95  $***P<0.0001$  versus sham;  $###P<0.0001$  versus PT+EV-Vector. **d**, Western blot analysis of ZO-1,  
 96 Occludin and Claudin-5 in the peri-infarct cortex at day 28 after PT. Three representative  
 97 immunoblots were presented from 6 mice/group.  $**P=0.0068$  (Claudin-5),  $***P=0.0006$  (ZO-1),  
 98  $***P=0.0009$  (Occludin) versus sham;  $\#P=0.0030$  (ZO-1),  $\#P=0.0034$  (Claudin-5),  $###P=0.0009$   
 99 (Occludin) versus PT+EV-Vector. The data **b**, **c** and **d** were expressed as means $\pm$ SEM; one-way  
 100 ANOVA followed by Holm-Sidak post hoc multiple comparison test. Source data are provided as a  
 101 Source Data file. BBB: blood-brain barrier; CD31: platelet endothelial cell adhesion molecule-1;  
 102 circSCMH1: circular RNA SCMH1; EB: Evans blue; EV: extracellular vesicle; Ib4: isolectin-B4; IgG:  
 103 immunoglobulin G; PT: photothrombotic; ZO-1: zona occludens 1.

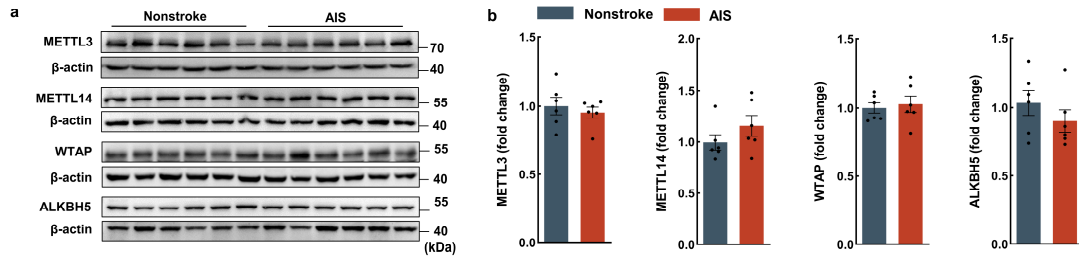

104

105

**Supplementary Fig. 4. The expression of METTL3, METTL14, WTAP, and ALKBH5 in AIS patients.**

106

107

**a** and **b**, Western blot analysis of METTL3, METTL14, WTAP, and ALKBH5 in the somatosensory cortex of AIS patients. There were 6 individuals/group. The significance was analyzed using the Student *t*-test (two-sided). All data were expressed as mean±SEM. Source data are provided as a Source Data file. ALKBH5: alkB homolog 5; AIS: acute ischemic stroke; circSCMH1: circular RNA SCMH1; METTL3: methyltransferase like 3; METTL14: methyltransferase like 14; WTAP: Wilms tumor 1-associated protein.

108

109

110

111

112

113

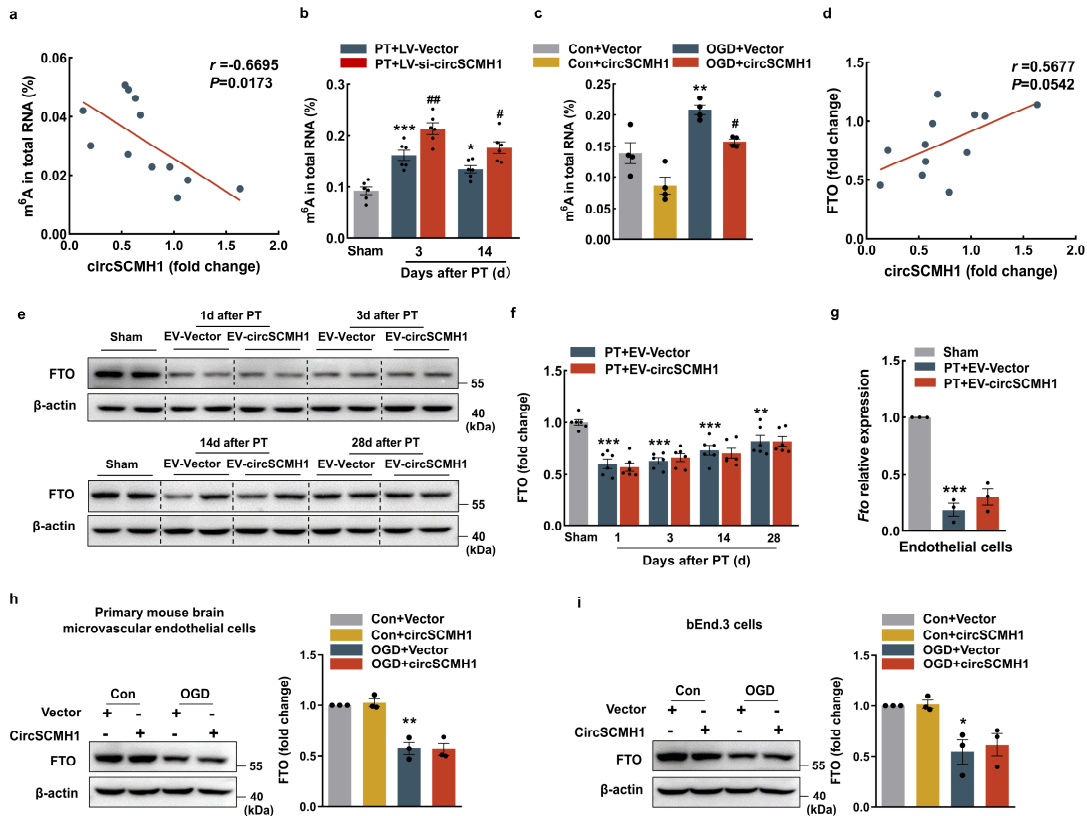

114

115 **Supplementary Fig. 5 circSCMH1 reduced the level of m<sup>6</sup>A but did not affect the FTO level**  
 116 **after stroke.**

117 **a**, Correlation analysis was performed based on the circSCMH1 and m<sup>6</sup>A level (Pearson correlation  
 118 coefficient  $r=-0.6695$ ,  $P=0.0173$ , two-sided,  $n=12$ ) in the somatosensory cortex of nonstroke and  
 119 AIS patients. **b**, Total RNA was extracted from the peri-infarct cortex of PT mice injected with LV-  
 120 si-circSCMH1, and m<sup>6</sup>A levels were determined as the percentage of all adenosine residues in RNA.  
 121  $n=6$  mice/group,  $*P=0.0235$ ,  $***P=0.0002$  versus sham,  $\#P=0.0218$ ,  $###P=0.0049$  versus PT+LV-  
 122 Vector. **c**, The m<sup>6</sup>A levels were determined in bEnd.3 cells treated with circSCMH1 overexpression  
 123 plasmid. Data were presented by 3 independent experiments.  $**P=0.0065$  versus Con+Vector,  
 124  $\#P=0.0440$  versus OGD+Vector. **d**, Correlation analysis between the circSCMH1 and FTO level  
 125 (Pearson correlation coefficient  $r=0.5677$ ,  $P=0.0542$ , two-sided,  $n=12$ ) in the somatosensory cortex  
 126 of nonstroke and AIS patients. **e**, and **f**, Western blot analysis of FTO expression after stroke in mice  
 127 with EV-circSCMH1. Two representative immunoblots were presented from 6 mice/group.  
 128  $**P=0.0085$  (28d),  $***P<0.0001$  (1d and 3d),  $***P=0.0002$  (14d) versus sham. **g**, ECs were isolated  
 129 from the peri-infarct cortex of mice at day 3 after PT. Relative expression of *Fto* mRNA in the sorted  
 130 ECs as determined by qPCR.  $n=3$  samples for each group. Each sample was pooled from 8 animals.  
 131  $***P=0.0001$  versus sham. **h**, and **i**, Western blot analysis of FTO after OGD treatment in the primary  
 132 mouse brain microvascular ECs (**h**) or bEnd.3 cells (**i**). Data were presented by 3 independent  
 133 experiments.  $*P=0.0134$ ,  $**P=0.0028$  versus Con+Vector. The data in **b**, **f** and **g** were expressed as  
 134 means $\pm$ SEM; one-way ANOVA followed by Holm-Sidak post hoc multiple comparison test. The  
 135 data in **c**, **h** and **i** were expressed as the mean $\pm$ SEM; two-way ANOVA followed by Bonferroni's  
 136 post hoc multiple comparison tests. Source data are provided as a Source Data file. AIS: acute  
 137 ischemic stroke; circSCMH1: circular RNA SCM1; Con: control; d: day; EV: extracellular vesicle;

138 FTO: fat mass and obesity-associated protein; LV: lentivirus; m<sup>6</sup>A: N<sup>6</sup>-methyladenosine; OGD:  
139 oxygen glucose deprivation; PT: photothrombotic.  
140



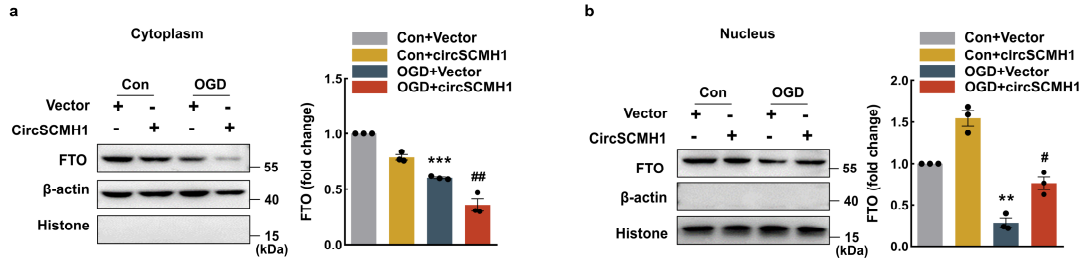

141

142

**Supplementary Fig. 6 CircSCMH1 altered the subcellular localization of FTO in bEnd.3 cells.**

143

**a and b**, Western blot analysis of FTO expression in the cytoplasm **(a)** and nucleus **(b)** of bEnd.3

144

cells. Data were presented by 3 independent experiments. \*\* $P=0.0029$ , \*\*\* $P=0.0007$  versus the

145

Con+Vector group. # $P=0.0235$ , ## $P=0.0090$  versus the OGD+Vector group. The data in **a** and **b** were

146

expressed as the mean $\pm$ SEM; two-way ANOVA followed by Bonferroni's post hoc multiple

147

comparison tests. Source data are provided as a Source Data file. circSCMH1: circular RNA

148

SCMH1; Con: control; FTO: fat mass and obesity-associated protein; OGD: oxygen glucose

149

deprivation.

150

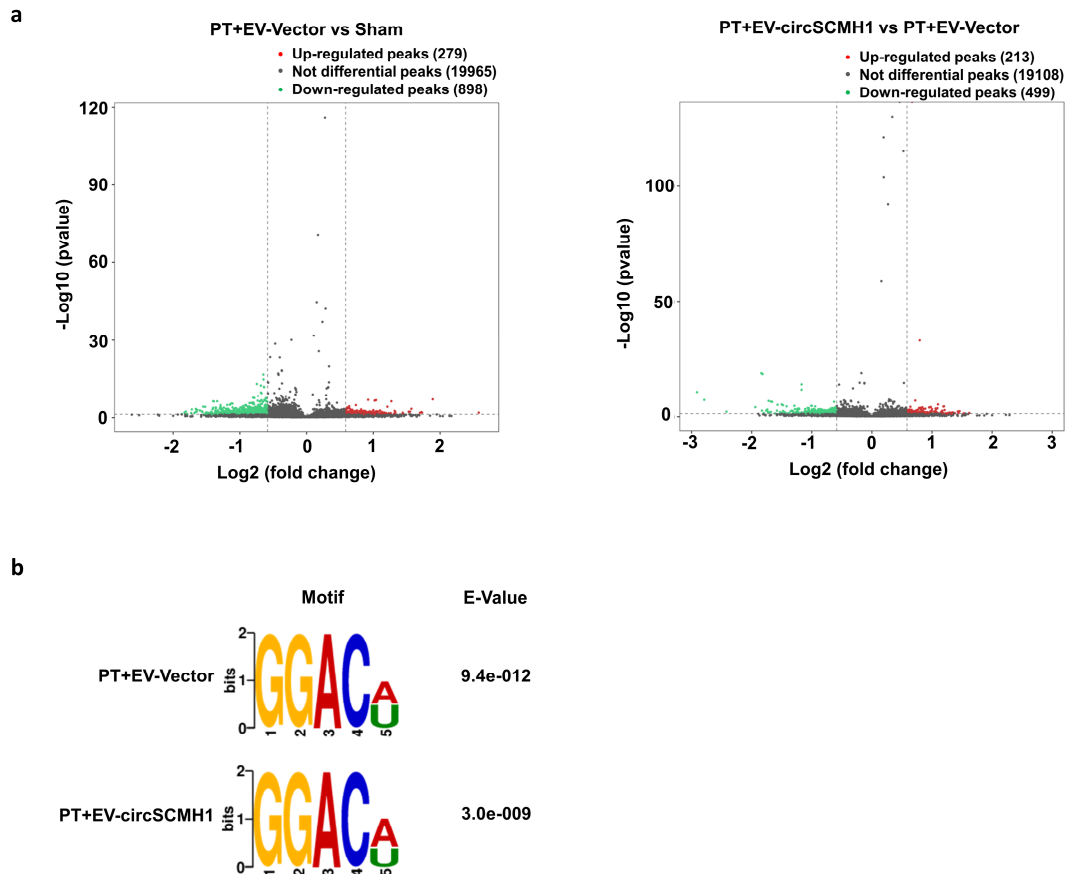

151

152 **Supplementary Fig. 7 m<sup>6</sup>A-sequence of the peri-infarct cortex of PT mice after EV-**  
 153 **circSCMH1 administration.**

154 **a**, Significant upregulation and downregulation in m<sup>6</sup>A methylation peaks of transcripts (fold  
 155 change $\geq$ 1.5,  $P$ <0.05, rescaled hypergeometric test). Total RNA was extracted from the control  
 156 cortex of 12 sham mice, the peri-infarct cortex of 12 mice with EV-Vector administration at day 14  
 157 post PT, and the peri-infarct cortex of 12 mice with EV-circSCMH1 administration at day 14 post  
 158 PT. MeRIP sequence analysis was performed after mRNA purification. **b**, Top consensus m<sup>6</sup>A motif  
 159 identified by DREME 4.12.0 with m<sup>6</sup>A peaks in the peri-infarct cortex of PT mice after EV-Vector  
 160 or EV-circSCMH1 administration. circSCMH1: circular RNA SCM1; EV: extracellular vesicle;  
 161 PT: photothrombotic.

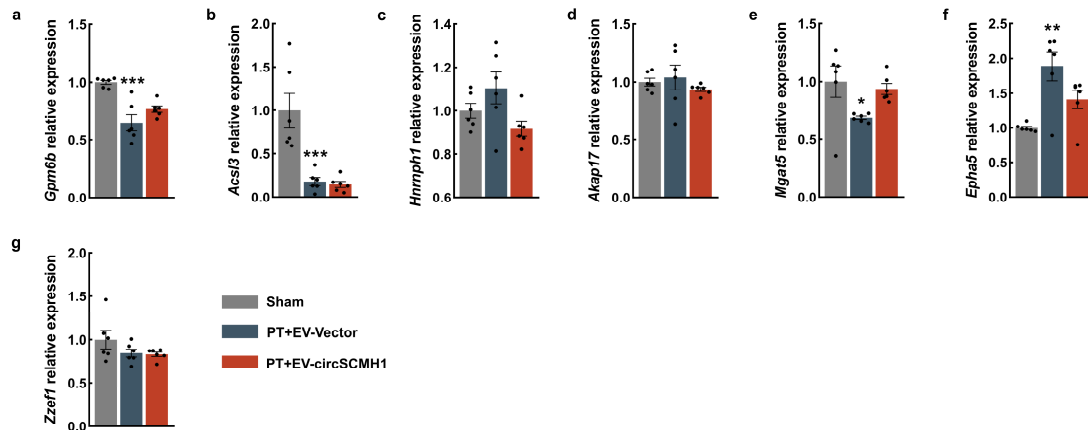

162

163 **Supplementary Fig. 8 The target gene expression of *Gpm6b*, *Acsl3*, *Hnrnp1*, *Akap17*, *Mgat5*,**  
 164 ***Epha5* and *Zzef1* in the peri-infarct cortex of mice at day 14 after PT model induction.**

165 **a-g**, The effect of EV-circSCMH1 on the levels of target gene was evaluated by qPCR in peri-  
 166 infarct cortex of mice at day 14 post PT. n=6 mice/group. \* $P=0.0499$  (e), \*\* $P=0.0019$  (f),  
 167 \*\*\* $P=0.0001$  (a), \*\*\* $P=0.0005$  (b) versus sham. All data were expressed as means $\pm$ SEM; one-way  
 168 ANOVA followed by Holm-Sidak post hoc multiple comparison test. Source data are provided as  
 169 a Source Data file. *Acsl3*: Acyl-CoA synthetase long chain family member 3; *Akap17b*: A kinase  
 170 (PRKA) anchor protein 17B; circSCMH1: circular RNA SCM1; EV: extracellular vesicle; *Epha5*:  
 171 EPH receptor A5; *Gpm6b*: glycoprotein M6B; *Hnrnp1*: heterogeneous nuclear ribonucleoprotein  
 172 H1; *Mgat5*: mannoside acetylglucosaminyltransferase 5; PT: photothrombotic. *Zzef1*: zinc finger  
 173 ZZ-type with EF hand domain 1.

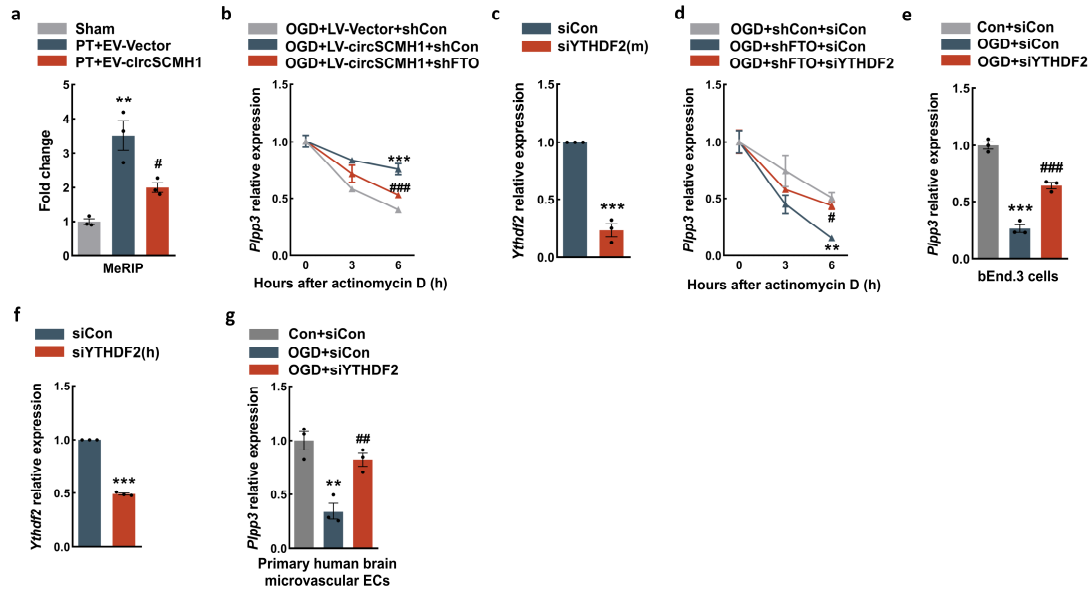

174

175 **Supplementary Fig. 9 CircSCMH1 increased mRNA stability of *Plpp3* via m<sup>6</sup>A.**

176 **a**, The cerebral microvessels were collected from the peri-infarct cortex of 8 mice at day 14 after  
 177 PT. Specific primer against the m<sup>6</sup>A peak were designed to amplify the m<sup>6</sup>A peak of *Plpp3* transcript.  
 178 Data were presented by 3 independent experiments. \*\**P*=0.0016 versus sham, #*P*=0.0135 versus  
 179 PT+EV-Vector. **b**, *Plpp3* mRNA stability assay after transfection with LV-circSCMH1 and shFTO  
 180 in bEnd.3 cells. Data were presented by 4 independent experiments. \*\*\**P*<0.0001 versus OGD+LV-  
 181 Vector+shCon; ###*P*=0.0003 versus OGD+LV-circSCMH1+shCon. **c**, The bEnd.3 cells were  
 182 transfected with mouse siYTHDF2, the level of *Ythdf2* mRNA was measured by qPCR. Data were  
 183 presented by 3 independent experiments. \*\*\**P*<0.0001 versus siCon group. **d**, *Plpp3* mRNA stability  
 184 assay after transfection with shFTO and siYTHDF2 in bEnd.3 cells. Data were presented by 3  
 185 independent experiments. \*\**P*=0.0092 versus OGD+shCon+siCon; #*P*=0.0269 versus  
 186 OGD+shFTO+siCon. **e**, The bEnd.3 cells were transfected with siYTHDF2, the level of *Plpp3*  
 187 mRNA was measured in OGD-induced bEnd.3 cells by qPCR. Data were presented by 3  
 188 independent experiments. \*\*\**P*<0.0001 versus Con+siCon, ###*P*=0.0003 versus OGD+siCon. **f**, The  
 189 primary human brain microvascular ECs were transfected with siYTHDF2, the level of *Ythdf2*  
 190 mRNA was measured by qPCR. Data were presented by 3 independent experiments. \*\*\**P*<0.0001  
 191 versus siCon. **g**, The primary human brain microvascular ECs were transfected with siYTHDF2, the  
 192 level of *Plpp3* mRNA was measured by qPCR after OGD. Data were presented by 3 independent  
 193 experiments. \*\**P*=0.0026 versus Con+siCon, ##*P*=0.0084 versus OGD+siCon. The data in **a**, **e** and  
 194 **g** were expressed as means±SEM; one-way ANOVA followed by Holm-Sidak post hoc multiple  
 195 comparison test. The data in **b** and **d** were expressed as means±SEM; two-way repeated measures  
 196 ANOVA followed by Holm-Sidak post hoc multiple comparison test. The data in **c** and **f** were  
 197 expressed as means±SEM; the Student *t* test (two-sided). Source data are provided as a Source Data  
 198 file. Con: control; h: human; LV: lentivirus; m: mouse; OGD: oxygen glucose deprivation; *Plpp3*:  
 199 lipid phosphate phosphatase 3; siCon: control siRNA; siYTHDF2: YTHDF2 siRNA; shCon: control  
 200 short hairpin RNA; shFTO: FTO short hairpin RNA; *Ythdf2*: YT521-B homology domain family 2.

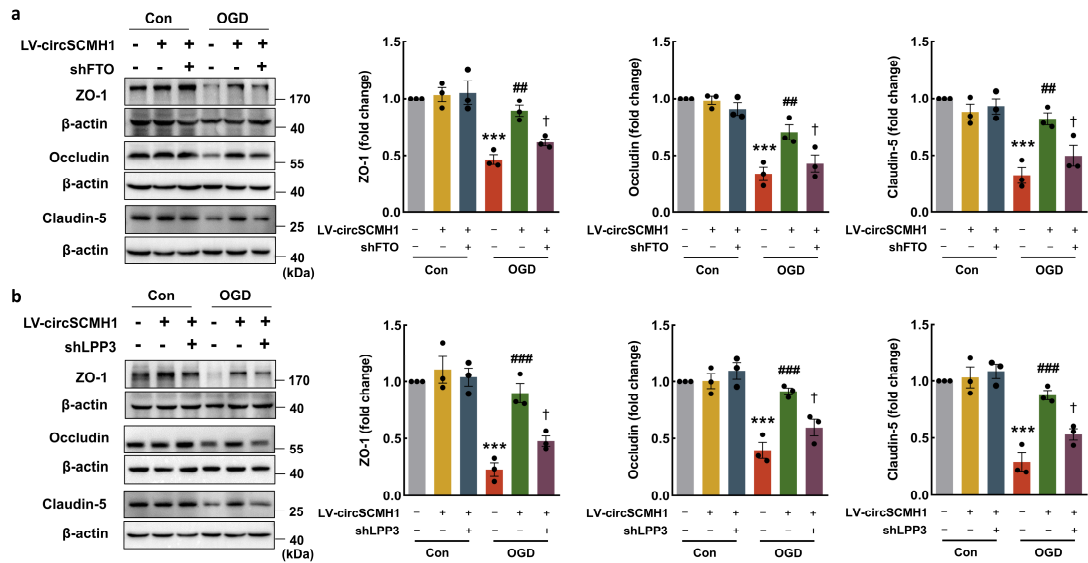

201

202 **Supplementary Fig. 10 Levels of tight junction proteins ZO-1, Occludin, and Claudin-5 in**  
 203 **bEnd.3 cells co-transfected with the circSCMH1 lentivirus and shFTO or shLPP3.**

204 **a** and **b**, The expressions of ZO-1, Occludin, and Claudin-5 were detected in bEnd.3 cells after co-  
 205 transfected with the circSCMH1 lentivirus and shFTO (**a**) or shLPP3 (**b**) in bEnd.3 cells. Data were  
 206 presented by 3 independent experiments. \*\*\* $P=0.0004$  (**a** ZO-1), \*\*\* $P<0.0001$  (**a** Occludin and **b**  
 207 Claudin-5), \*\*\* $P=0.0001$  (**a** Claudin-5, **b** ZO-1 and **b** Occludin) versus Con; ## $P=0.0025$  (**a** ZO-1),  
 208 ## $P=0.0048$  (**a** Occludin), ## $P=0.0018$  (**a** Claudin-5), ### $P=0.0004$  (**b** ZO-1), ### $P=0.0005$  (**b**  
 209 Occludin), ### $P=0.0002$  (**b** Claudin-5) versus OGD; † $P=0.0434$  (**a** ZO-1), † $P=0.0264$  (**a** Occludin),  
 210 † $P=0.0352$  (**a** Claudin-5), † $P=0.0130$  (**b** ZO-1), † $P=0.0181$  (**b** Occludin), † $P=0.0137$  (**b** Claudin-5)  
 211 versus OGD+LV-circSCMH1. The data in **a** and **b** were expressed as means±SEM; one-way  
 212 ANOVA followed by Holm-Sidak post hoc multiple comparison test. Source data are provided as a  
 213 Source Data file. CircSCMH1: circular RNA SCM1; FTO: fat mass and obesity-associated protein;  
 214 LV: lentivirus; shFTO: FTO short hairpin RNA; shLPP3: LPP3 short hairpin RNA; ZO-1: zona  
 215 occludens 1.  
 216

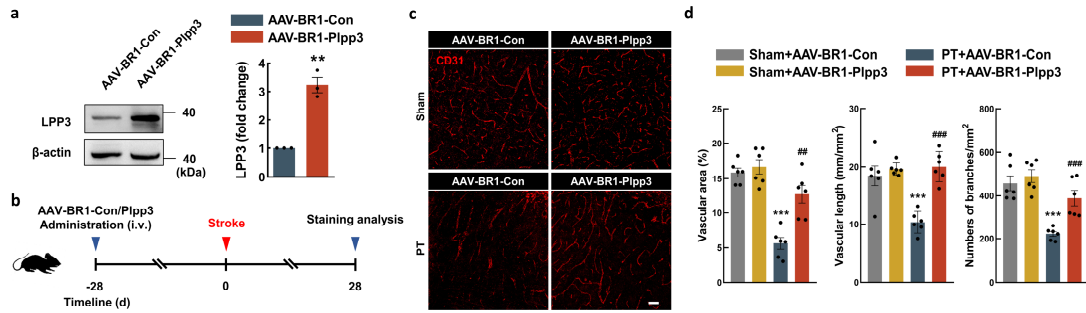

217

218

**Supplementary Fig. 11 Endothelial-target *Plpp3* overexpression promoted vascular repair in PT mice.**

219

220

**a**, The mice were subjected with AAV-BR1-Plpp3 by intravenous injection. The microvessels were collected from three mice at day 28 after AAV-BR1-Plpp3 injection. The expression of LPP3 was measured by western blot analysis in microvessels. Data were presented by 3 independent experiments.  $**P=0.0013$  versus AAV-BR1-Con. **b**, Schematic of AAV-BR1-Con/Plpp3 administration and staining analysis in mice. **c** and **d**, Representative images with CD31 staining showing blood vessels in the peri-infarct cortex at day 28 after PT in mice, followed by the analysis of vascular area fraction, total vascular length, and number of branches.  $n=6$  mice/group. Scale bars,  $50\ \mu\text{m}$ .  $***P<0.0001$  (Vascular area and Number of branches),  $***P=0.0010$  (Vascular length) versus sham+AAV-BR1-Con;  $\#P=0.0021$  (Vascular area),  $###P=0.0002$  (Vascular length),  $###P<0.0001$  (Number of branches) versus PT+AAV-BR1-Con. The data in **a** were expressed as means $\pm$ SEM; the Student *t* test (two-sided). The data in **d** were expressed as the mean $\pm$ SEM; two-way ANOVA followed by Bonferroni's post hoc multiple comparison tests. Source data are provided as a Source Data file. AAV: adeno-associated virus; CD31: platelet endothelial cell adhesion molecule-1; *Plpp3*/LPP3: lipid phosphate phosphatase 3; PT: photothrombotic.

234

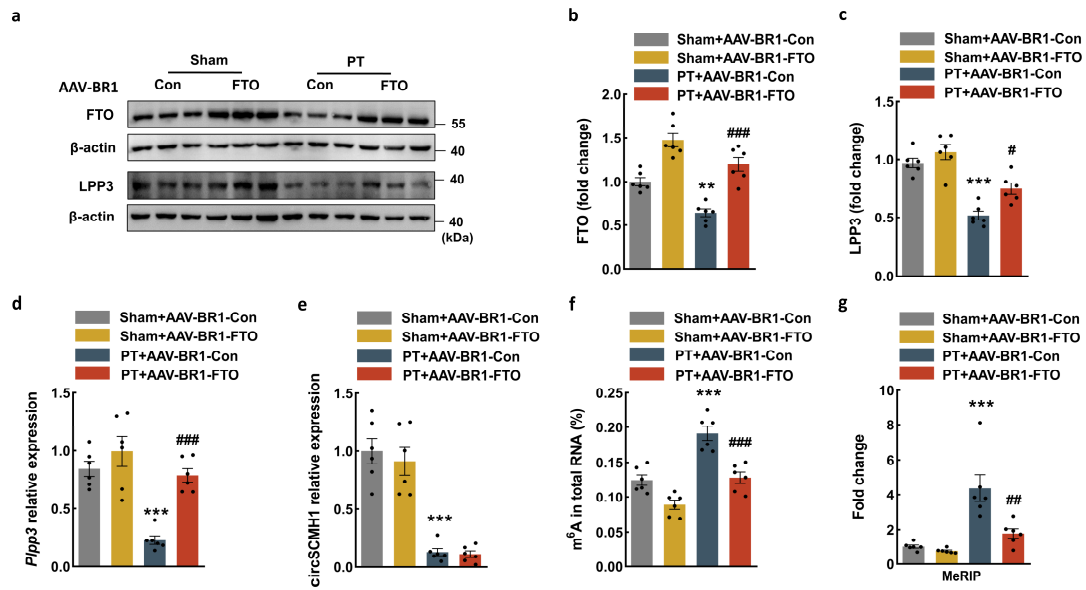

235

236 **Supplementary Fig. 12 The effect of AAV-BR1-FTO on the levels of FTO, LPP3, circSCMH1,**  
 237 **m<sup>6</sup>A levels in total RNA and *Plpp3* expression and methylation levels.**

238 **a, b and c,** The mice were administrated with AAV-BR1-FTO, and subjected to PT stroke at day 28  
 239 after AAV-BR1-FTO injection. The peri-infarct cortex was isolated to detection the level of FTO  
 240 and LPP3 at day 3 after PT model induction. Three representative immunoblots were presented from  
 241 6 mice/group. \*\**P*=0.0085, \*\*\**P*=0.0002 versus sham+AAV-BR1-Con; #*P*=0.0459, ###*P*=0.0001  
 242 versus PT+AAV-BR1-Con. **d, e, f and g,** The total RNA were extracted from the peri-infarct tissue  
 243 of mice at day 3 after PT to determine the levels of circSCMH1 (**d**) and *Plpp3* (**e**), the m<sup>6</sup>A levels  
 244 in total RNA (**f**), the m<sup>6</sup>A of *Plpp3* (**g**). n=6 mice/group, \*\*\**P*=0.0003 (**d**), \*\*\**P*<0.0001 (**e**),  
 245 \*\*\**P*=0.0005 (**f**), \*\*\**P*=0.0002 (**g**) versus sham+AAV-BR1-Con; ##*P*=0.0022 (**g**), ####*P*=0.0009 (**d**),  
 246 ###*P*=0.0008 (**f**) versus PT+AAV-BR1-Con. Data in **b, c, d, e, f and g** were expressed as the  
 247 mean±SEM; two-way ANOVA followed by Bonferroni's post hoc multiple comparison tests. Source  
 248 data are provided as a Source Data file. AAV: adeno-associated virus; circSCMH1: circular RNA  
 249 SCMH1; *Plpp3*/LPP3: lipid phosphate phosphatase 3; FTO: fat mass and obesity-associated protein;  
 250 m<sup>6</sup>A: N<sup>6</sup>-methyladenosine; PT: photothrombotic.

251

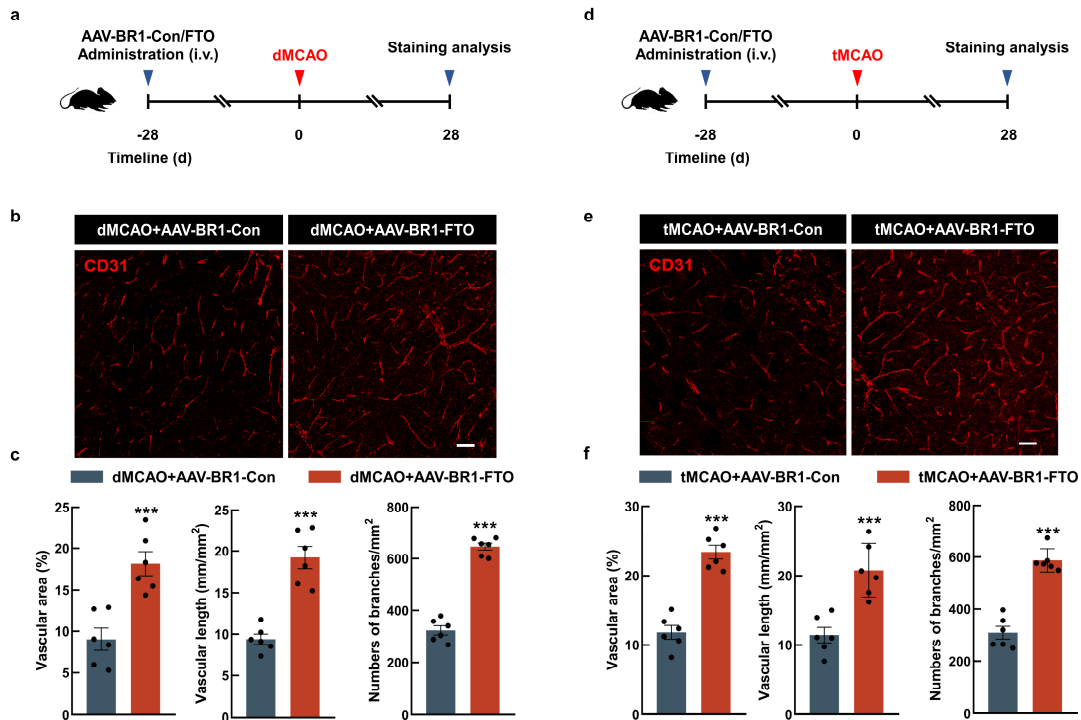

**Supplementary Fig. 13 Endothelial-target FTO overexpression promoted vascular repair in dMCAO or tMCAO mice.**

**a**, Schematic of AAV-BR1-FTO administration and staining analysis in dMCAO mice. **b** and **c**, Representative images with CD31 staining showing blood vessels in the peri-infarct cortex at day 28 after dMCAO model induction, followed by the analysis of vascular area fraction, total vascular length, and number of branches.  $n=6$  mice/group. Scale bars,  $50\ \mu\text{m}$ .  $***P=0.0008$  (Vascular area),  $***P<0.0001$  (Vascular length and Numbers of branches) versus dMCAO+AAV-BR1-Con. **d**, Schematic of AAV-BR1-FTO administration and staining analysis in tMCAO mice. **e** and **f**, Representative images with CD31 staining showing blood vessels in the peri-infarct cortex at day 28 after tMCAO model induction, followed by the analysis of vascular area fraction, total vascular length, and number of branches.  $n=6$  mice/group. Scale bars,  $50\ \mu\text{m}$ .  $***P<0.0001$  (Vascular area and Numbers of branches),  $***P=0.0006$  (Vascular length) versus tMCAO+AAV-BR1-Con. The data in **c** and **f** were expressed as means $\pm$ SEM; the Student *t* test (two-sided). Source data are provided as a Source Data file. AAV: adeno-associated virus; CD31: platelet endothelial cell adhesion molecule-1; d: day; dMCAO: distal middle cerebral artery occlusion; FTO: fat mass and obesity associated protein; tMCAO: transient middle cerebral artery occlusion.



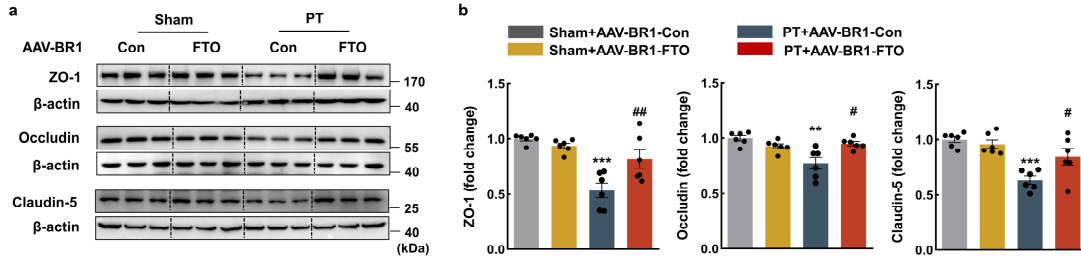

270

271 **Supplementary Fig. 14 Levels of tight junction proteins ZO-1, Occludin, and Claudin-5 in**  
 272 **mice injected with AAV-BRI-FTO at day 28 after PT stroke.**

273 **a and b,** The expression of ZO-1, Occludin, and Claudin-5 was detected in PT mice with AAV-BRI-  
 274 FTO. Three representative immunoblots were presented from 6 mice/group.  $**P=0.0022$  (Occludin),  
 275  $***P<0.0001$  (ZO-1),  $***P=0.0002$  (Claudin-5) versus sham+AAV-BR1-Con,  $\#P=0.0156$  (Occludin),  
 276  $\#P=0.0214$  (Claudin-5),  $\#\#P<0.0030$  (ZO-1) versus PT+AAV-BR1-Con. The data in **b** were  
 277 expressed as the mean $\pm$ SEM; two-way ANOVA followed by Bonferroni's post hoc multiple  
 278 comparison tests. Source data are provided as a Source Data file. AAV: adeno-associated virus; FTO:  
 279 fat mass and obesity-associated protein; PT: photothrombotic; ZO-1: zona occludens 1.

280

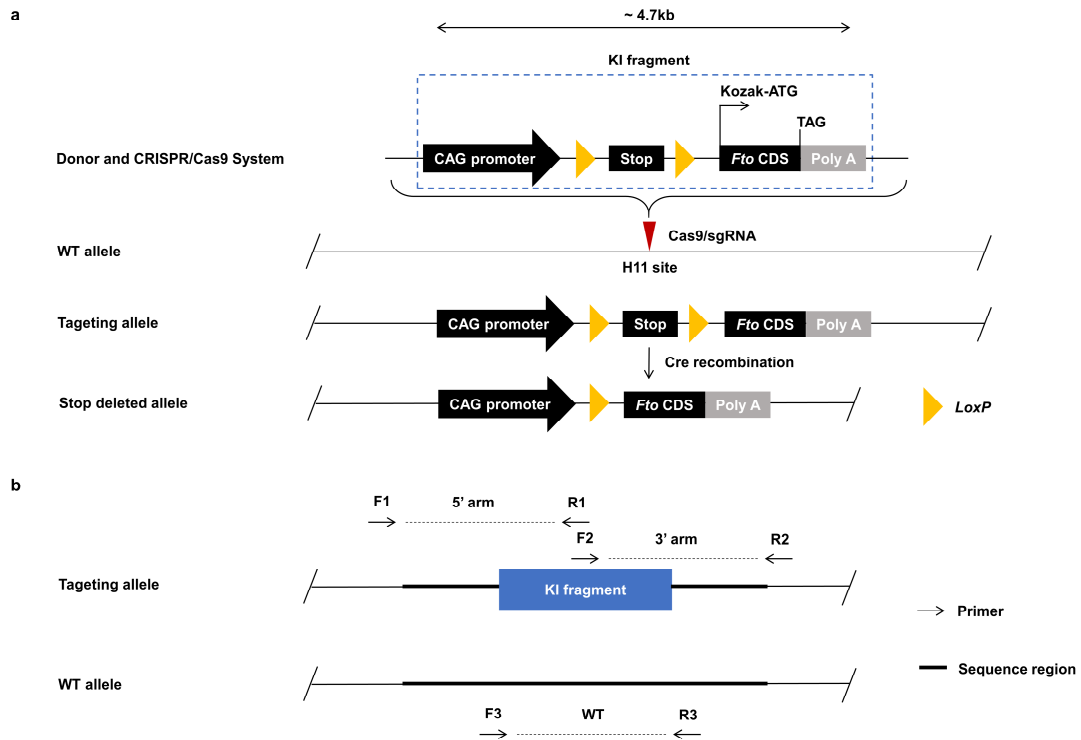

281

282 **Supplementary Fig. 15 Generation and identification of conditional *Fto<sup>lox</sup>* cKI mice.**

283 **a**, Schematic of the targeting construct used to create *Fto<sup>lox</sup>* cKI mice. For initial characterization,  
 284 *Fto<sup>lox</sup>* cKI mice were injected with AAV-BR1-Cre. **b**, Schematic of the identification of *Fto<sup>lox</sup>* cKI  
 285 mice. AAV: adeno-associated virus; Cre: cyclization recombination; CRISPR: clustered regularly  
 286 interspaced short palindromic repeats; FTO: fat mass and obesity-associated protein; H11: *Hippo*  
 287 *11*; sgRNA: single-guide RNA; WT: wild type.

288

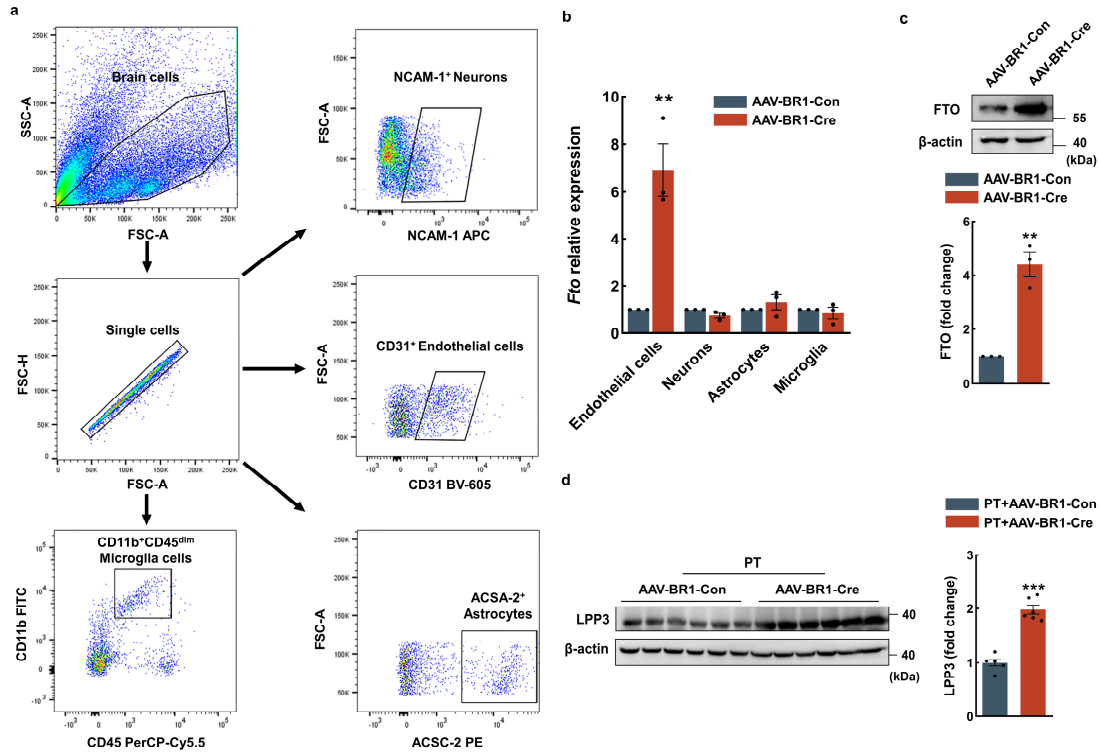

289

290 **Supplementary Fig. 16 Levels of FTO and LPP3 in *Fto*<sup>flox/flox</sup> cKI mice injected with AAV-BR1-**  
 291 **Cre.**

292 **a**, Schematic of neurons, astrocytes, microglia, and endothelial cells isolation from PT stroke mice.  
 293 **b**, The neurons, astrocytes, microglia, and ECs were isolated from total brain of *Fto*<sup>flox/flox</sup> cKI mice  
 294 injected with AAV-BR1-Con/Cre for 4 weeks. Relative expression of *Fto* was determined by qPCR.  
 295 n=3 samples for each group. Each sample was pooled from 3 animals. \*\**P*=0.0059 versus AAV-  
 296 BR1-Con. **c**, The microvessels were collected from three *Fto*<sup>flox/flox</sup> cKI mice injected with AAV-  
 297 BR1-Con/Cre for 4 weeks. The expression of FTO was measured by western blot analysis in  
 298 microvessels. Data were presented by 3 independent experiments. \*\**P*=0.0018 versus AAV-BR1-  
 299 Con. **d**, The expression of LPP3 was detected in *Fto*<sup>flox/flox</sup> cKI mice injected with AAV-BR1-  
 300 Con/Cre at day 28 after PT. The representative immunoblots were presented from 6 mice/group.  
 301 \*\*\**P*<0.0001 versus PT+AAV-BR1-Con. The data in **b**, **c** and **d** were expressed as means±SEM; the  
 302 Student *t* test (two sided). Source data are provided as a Source Data file. AAV: adeno-associated  
 303 virus; Cre: cyclization recombination; FTO: fat mass and obesity-associated protein; LPP3: lipid  
 304 phosphate phosphatase 3; PT: photothrombotic.

305

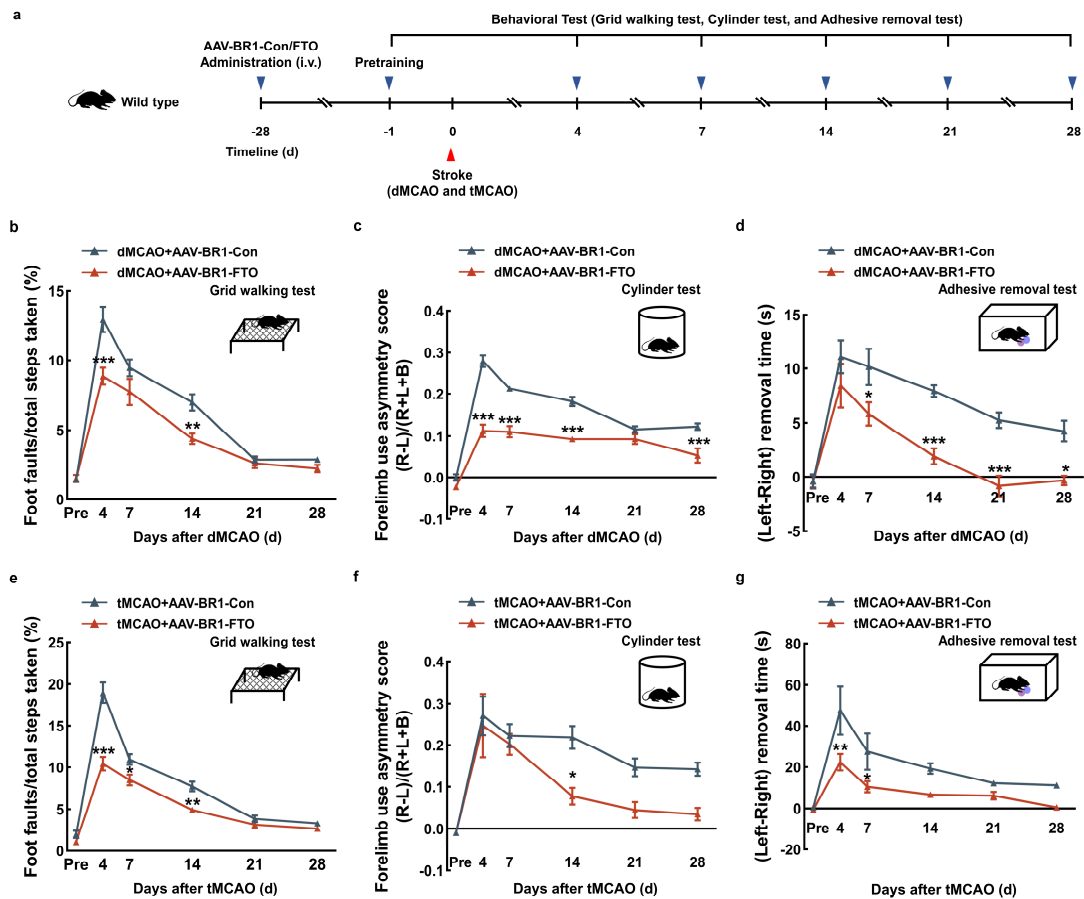

306

307

**Supplementary Fig. 17 Endothelial-targeted FTO overexpression promoted motor functional recovery in dMCAO and tMCAO mice.**

308

309 **a**, Schematic of AAV-BR1-FTO administration and behavioral analysis in dMCAO or tMCAO mice.

310 **b**, **c** and **d**, Endothelial-targeted FTO overexpression improved behavioral recovery at different time

311 points after dMCAO as measured by the grid-walking test, cylinder test and adhesive removal test.

312 L indicates left forepaw in cylinder test; R, right forepaw in cylinder test; B, both forepaws in

313 cylinder test. n=12 mice for dMCAO+AAV-BR1-Con group and dMCAO+AAV-BR1-FTO group.

314 \* $P=0.0182$  (adhesive removal test 7d), \* $P=0.0150$  (adhesive removal test 28d), \*\* $P=0.0034$  (grid-

315 walking test 14d), \*\*\* $P<0.0001$  (grid-walking test 4d, cylinder test 4d, 7d, 14d and 28d), \*\*\* $P=0.0009$

316 (adhesive removal test 14d and 21d) versus dMCAO+AAV-BR1-Con. **e**, **f** and **g**, Endothelial-

317 targeted FTO overexpression improved behavioral recovery at different time points after tMCAO

318 as measured by the grid-walking test, cylinder test and adhesive removal test. L indicates left

319 forepaw in cylinder test; R, right forepaw in cylinder test; B, both forepaws in cylinder test. n=12

320 mice for tMCAO+AAV-BR1-Con group and tMCAO+AAV-BR1-FTO group. \* $P=0.0122$  (grid-

321 walking test 7d), \* $P=0.0117$  (cylinder test 14d), \* $P=0.0470$  (adhesive removal test 7d), \*\* $P=0.0058$

322 (grid-walking test 14d), \*\* $P=0.0012$  (adhesive removal test 4d), \*\*\* $P<0.0001$  (grid-walking test 4d)

323 versus tMCAO+AAV-BR1-Con. The data in **b**, **c**, **d**, **e**, **f** and **g** were expressed as the mean±SEM;

324 two-way repeated measures ANOVA followed by Holm-Sidak post hoc multiple comparison test.

325 Source data are provided as a Source Data file. AAV: adeno-associated virus; circSCMH1: circular

326 RNA SCMH1; d: day; dMCAO: distal middle cerebral artery occlusion; FTO: at mass and obesity-

327 associated protein; tMCAO: transient middle cerebral artery occlusion; PT: photothrombotic.
